## 1 SUMMARY

2 **Macrophages are an essential part of tissue development and physiology. Perivascular**  
3 **macrophages have been described in tissues and appear to play a role in development**  
4 **and disease processes, although it remains unclear what are the key features of these**  
5 **cells. Here, we identify a subpopulation of perivascular macrophages in several organs,**  
6 **characterized by their dependence on the transcription factor c-MAF, displaying non-**  
7 **conventional macrophage markers including LYVE1, Folate receptor 2 and CD38.**  
8 **Conditional deletion of c-MAF in macrophage lineages caused ablation of perivascular**  
9 **macrophages in the brain and altered muscularis macrophages program in the intestine.**  
10 **In the white adipose tissue (WAT), c-MAF deficient perivascular macrophages displayed**  
11 **an altered gene expression profile, which was linked to an increased vascular branching**  
12 **into the tissue. Upon feeding on high fat diet (HFD), mice with c-MAF deficient**  
13 **macrophages showed improved metabolic parameters compared to wild-type mice,**  
14 **including less weight gain, greater glucose tolerance and reduced inflammatory cell**  
15 **profile in WAT. These results define c-MAF as a central regulator of perivascular**  
16 **macrophages cell identity and transcriptional program *in vivo* and reveal a novel role for**  
17 **this tissue resident macrophage population in the regulation of metabolic syndrome.**

18

## 19 INTRODUCTION

20 Since the seminal discovery of macrophages by Eli Metchnikoff(1), this immune cell type has  
21 been designated as a central player in innate immune responses. In the past decades, different  
22 flavors of macrophages have been uncovered and their importance in the ontogeny and function  
23 of several organs has become clear. For example, osteoclasts are crucial for proper bone  
24 remodeling, microglia for synaptic pruning, and lung alveolar macrophages for clearance of  
25 surfactant(2-7). Among the diverse subpopulations, perivascular macrophages have been  
26 associated with the regulation of tissue physiology. These cells function as a first barrier for  
27 invading pathogens or for potentially harmful blood-born substances in the tissues(8). However,  
28 tools to selectively target *in vivo* perivascular macrophages have not been developed so far.  
29 Therefore, deciphering molecules that contribute to the development or function of this cell  
30 subpopulation is fundamental to better understand their role in the organism physiology.

31

32 The white adipose tissue (WAT) of healthy adult animals contains a large population of innate  
33 and adaptive immune cells, numerically dominated by macrophages. The proportions and  
34 numbers of these immune cell types is known to change widely in conditions such as diet-  
35 induced obesity, genetically-determined obesity, fasting, infections, and aging, among other  
36 situations(9-17). We previously characterized the epididymal WAT (eWAT) macrophage cell  
37 populations fed normal diet (ND) in adult B6 mice. The predominant populations under these

1 conditions were perivascular macrophages, which we named Vasculature-Associated adipose  
2 tissue Macrophages (VAM) 1, and VAM2(15). As their name suggest, both VAM populations are  
3 in very close contact with blood vessels, allowing them to rapidly endocytose a diverse array of  
4 macromolecules present in the bloodstream(6, 15, 18-22). Here, we searched for key molecules  
5 that define cell identity and functional properties of perivascular macrophages found across  
6 different tissues, revealing the transcription factor c-MAF as a fundamental factor to establish  
7 embryonically derived perivascular macrophages cell identity and function *in vivo*.

## 8 9 **RESULTS**

### 10 11 **The Adipose tissue displays a subpopulation of perivascular macrophages dependent of** 12 **the transcription factor c-MAF.**

13 Our previous published data revealed that VAMs display several atypical surface markers for  
14 macrophages (CD38<sup>+</sup> LYVE1<sup>+</sup> Folate Receptor 2 (Folr2)<sup>+</sup> CD206<sup>HIGH</sup>)(15) (Fig. S1A). VAMs were  
15 previously divided in VAM1 (MHCII<sup>HIGH</sup>TIM4<sup>LOW</sup>) and VAM2 (MHCII<sup>LOW</sup>TIM4<sup>HIGH</sup>)(15), both  
16 representing macrophages intimately associated to blood vessels (Fig. 1A and fig. S1A). In  
17 human white visceral adipose tissue, we also observed the presence of perivascular  
18 macrophages tightly associated with the endothelium, displaying some of the markers of the  
19 Lyve1<sup>+</sup>CD206<sup>HIGH</sup> VAMs (Fig. 1B and fig. S1B). This close contact with endothelial cells is  
20 associated with a high endocytic capacity for blood-borne macromolecules (Fig. S1C). To define  
21 the functional relevance of VAMs, we aimed at characterizing transcription factors preferentially  
22 or exclusively expressed by VAMs, hence to establish genetic targeting tools.

23  
24 Analysis of our previously published epididymal WAT (eWAT) VAMs transcriptomics database  
25 (15) indicated that among all transcription factors sequenced, *Maf*, encoding the avian  
26 musculoaponeurotic fibrosarcoma oncogene homolog c-MAF, was highly expressed by VAMs  
27 (Fig. 1C). *Maf* expression in monocytes and CD11b<sup>-</sup> DCs was much lower than in VAMs in the  
28 eWAT (Fig. 1C). *Maf* expression is also low in other tissue resident macrophages, such as  
29 microglia (Immgen.org and (23)), but observed in several non-hematopoietic cells, including  
30 Lymphatic Endothelial Cells (LEC). c-MAF was first reported to be expressed by myeloid cells in  
31 the 2000s when it was observed *in vitro* that it could modulated the expression of IL-10 in LPS  
32 stimulated murine macrophage cell lines (24, 25). More recently, it was show *in vitro* that c-MAF  
33 modulates the expression of several genes of M2-Like polarized bone-marrow derived  
34 macrophages (26, 27). c-MAF deficiency in mice leads to embryonic and postnatal lethality (28,  
35 29). This has restricted the evaluation of c-MAF relevance for macrophages function *in vivo*. To  
36 circumvent that some groups tried to do bone-marrow chimeras by transferring fetal liver cells  
37 (E13-5) from *Maf* deficient embryos to lethally irradiated WT hosts (30, 31), a strategy that limits

1 the observations mostly to radiosensitive/bone marrow derived cells. Therefore, it remains  
2 unclear how c-MAF contribute specifically to the function of low cycling resident perivascular  
3 macrophages such as VAMs *in vivo* (15). Thus, we first focused on the gene *Maf* as a target.

4  
5 There is no available Cre driver to target specifically VAMs. *Lyve1<sup>Cre</sup>* is also expressed by its  
6 original target, LEC (Immgen.org). *Lyz2* (*LysM*)<sup>Cre</sup>, the most commonly used Cre driver to target  
7 macrophages, is also expressed by other non-perivascular macrophages (except microglia) and  
8 is very highly expressed by granulocytes and monocytes, although LEC do not express *Lyz2*.  
9 Likewise, LEC do not express *Csf1r* (Immgen.org). *Csf1r<sup>Cre</sup>* is expressed by yolk sac  
10 erythromyeloid progenitors (EMP), the precursors of tissue resident macrophages(32, 33),  
11 whereas *Lyz2* is not. Thus, we selected these three Cre drivers that share the property of being  
12 expressed by VAMs, while differing in their expression in cell types, to cross with *Maf<sup>Flox</sup>*  
13 mice(34). We utilized a Venn diagram logic to use the three Cre drivers for complementary VAM  
14 targeting (Fig. 1D). All the conditional *Maf*-deficient mice survived into adulthood, gain weight  
15 normally, and have a normal gross anatomy (Data not shown). There was no obvious lymphatic  
16 drainage impairment in the *Lyve1<sup>Cre</sup>Maf<sup>F/F</sup>* strain, which can be manifested by swollen  
17 extremities, due to liquid accumulation (Fig. S1D). Consistently, we observed a preserved  
18 capacity of the lymphatic vessels to drain evans blue dye from the foot pad to the popliteal  
19 lymph node (Fig. S1E, F). Furthermore, light-sheet microscopy using AdipoClear(35), which  
20 allows visualization of full architecture of the lymphatic vessels, showed that the eWAT lymphatic  
21 tree in *Lyve1<sup>Cre</sup>Maf<sup>F/F</sup>* could be formed (Fig. S1G) and that the lymphatic vessels do not show  
22 any clear structural difference from those of WT mice (Fig. S1H).

23  
24 VAMs were profoundly impacted by *Maf* gene deletion in the eWAT (Fig. 1E-H), observation  
25 recapitulated with all the Cre drivers, using flow cytometry, gene expression, and function. The  
26 population of VAM2 (*Tim4<sup>HIGH</sup>MHCII<sup>LOW</sup>*) was no longer observed, while VAM1  
27 (*Tim4<sup>LOW</sup>MHCII<sup>HIGH</sup>*) was reduced by *Maf* targeting (Fig. 1E, F). These phenotypes were  
28 accompanied by a significant increase of cells in the normally underrepresented double-positive  
29 quadrant (*Tim4<sup>HIGH</sup>MHCII<sup>HIGH</sup>*) (Fig. 1E, F), resulting in an unaltered total number of VAMs  
30 (*CD45<sup>+</sup>CD64<sup>+</sup>CD11b<sup>+</sup>CD206<sup>HIGH</sup>*) among *Maf* mutants and WT littermates (Fig. 1F). Non-  
31 perivascular *CD11c<sup>+</sup>CD64<sup>+</sup>* (DP) macrophages, which constitute a minor population in the eWAT  
32 from healthy mice, were unaffected both phenotypically and numerically by *Maf* gene deletion  
33 (Fig. S1I), consistent with a reduced (roughly 5X) expression of the *Maf* gene (Fig. 1C).

34



1 We subsequently analyzed the transcriptional profiles of eWAT VAMs upon *Maf* deletion.  
2 Compared to WT VAM1s, the gene expression pattern of *Maf* deficient VAMs had more than  
3 700 differentially expressed genes, indicating that indeed *Maf* strongly shapes the transcriptional  
4 program of VAMs (Fig. 1G). In addition to the higher expression of *Timd4* compared to WT  
5 VAM1 cells, a number of anti-inflammatory genes, including *Il1rn*, *Tnfaip3*, *Hmox* and *ApoE*(36),  
6 were also upregulated in *Maf*-deficient VAMs (Fig. 1G, H). There was also upregulation of  
7 *Hif3a*/Nepas and *Cdkn1a* in *Maf*-deficient VAMs (Fig. 1G, H). *Hif3a* is a known repressor of the  
8 transcriptional activity of *Hif-1a* and *Hif-2a/Epas*(37), the two key genes that macrophages  
9 upregulate in response to hypoxia(38). *Cdkn1a* was shown to be instrumental in macrophage  
10 switching from a pro-inflammatory to an immunosuppressive state, and loss of *Cdkn1a* results in  
11 increased macrophage secretion of IFN $\beta$  and TNF $\alpha$ (39). There was reduced expression in *Maf*-  
12 deficient VAMs of *Ccl8* expression (Fig. 1H), a gene encoding a chemokine that, together with  
13 CCL2, attracts inflammatory monocytes(40) and is highly expressed by both VAM1 and 2 in the  
14 eWAT of WT mice(15). *Maf* ablation also resulted in downmodulation of *Pdgfc* by VAMs, a gene  
15 important to the cross talk between VAMs and the Csf-1-producing fibroblastic reticular cells, as  
16 well as a series of lectin and scavenger receptors, including as *Fcrls*, *CD209f*, *CD209g* and  
17 *Siglech* (Fig. 1H). Thus, the overall gene expression changes in VAM suggest that mice with  
18 conditional *Maf* deletion would be more resistant to adipose tissue inflammation, for example the  
19 one caused by high fat diet (HFD).

20

### 21 ***Maf* dependent VAM2s are predominantly embryonically sac derived**

22 It is widely accepted that macrophages have two origins, one in yolk sac erythromyeloid  
23 progenitors (EMP), and the other in hematopoietic stem cells (HSC, fetal liver or bone marrow),  
24 via monocytes(41-43). To evaluate the origin of VAM1 and VAM2 we firstly carried out irradiated  
25 bone marrow (BM) chimeras (Fig. 2A). As expected, after two months all monocytes were donor-  
26 derived (Fig. 2B). However, a sizeable percentage of the eWAT VAMs (~30-50%) were host  
27 derived (Fig. 2B). VAM2s were only found in this group, retaining its TIM4<sup>+</sup>MHCII<sup>LOW</sup> phenotype  
28 (Fig. 2C). Donor-derived macrophages were almost exclusively present in the VAM1 TIM4<sup>-</sup>  
29 compartment (80-90%) (Fig. 2C). These experiments show that HSC do not contribute  
30 significantly to the VAM2 compartment. To independently confirm this data we performed kidney  
31 capsule transplant of neonatal eWAT to evaluate how the cell distribution would take place  
32 without irradiation (Fig. S2A). As observed in the BM chimeras, BM-derived macrophages were  
33 almost exclusively present in the VAM1 compartment while the few VAM2 found were  
34 reminiscent from the neonate donor (Fig. S2B). Finally, to verify a possible embryonic origin for  
35 VAM2 we used *CX3CR1*<sup>CreER</sup> mice(44), as *CX3CR1* is expressed by yolk sac EMPs(41, 43), but  
36 not HSCs. We carried out fate-mapping experiments by injecting a single low dose (to avoid

1 abortion) of tamoxifen in a pregnant CX3CR1<sup>CRE-ERT2</sup> x R26<sup>-LSL-DsRed</sup> female mice (E8.5-9.5) (Fig.  
2 2D). While the distribution, in adults, of VAM1 and VAM2 are approximately at a 50:50  
3 percentage (Fig. 2E and(15)), the cells fate mapped at E9.5 were predominantly VAM2 (more  
4 than 70%, Fig. 2E). The above data indicates that VAM2 are embryonically derived while VAM1  
5 are predominantly bone marrow derived.

6  
7 Several reports in the literature describe that the CC motif chemokine receptor 2 (CCR2) is a  
8 fundamental chemokine receptor for tissue homing of BM-derived monocytes that give rise to  
9 BM-derived macrophages(45-47). Hence, we decided to evaluate CCR2 knockout (KO) animals  
10 to verify the impact in the distribution of VAM1. When we examined the VAMs compartment in  
11 the eWAT, virtually all cells TIM4<sup>+</sup> are vanished while the VAM2 are maintained in CCR2  
12 deficient animals (Fig. 2F, H), further supporting their embryonically origin, while VAM1 are  
13 predominantly bone-marrow derived.

14  
15 The dichotomy in the developmental origin between VAM1 and VAM2 led us to investigate how  
16 the populations are distributed during the establishment of a mature eWAT. First, we evaluated  
17 whether macrophages display adult morphological features in the developing fat pad. Confocal  
18 microscopy from P5 animals indicated that the developing eWAT resembles an empty sac with  
19 few developing adipocytes, an extensive blood network and VAMs with a different morphology  
20 (Fig. 2H). Instead of wrapping around blood vessels, a substantial fraction of the VAMs display a  
21 phenotype just emitting projections towards the blood vessels, far away from adipocytes (Fig.  
22 2H, I). This environmental difference during the eWAT development reflected in the kinetics of  
23 VAM1 and VAM2 distribution in the organ. In WT pups, the first eWAT VAMs to appear, at P10,  
24 had a VAM2 phenotype, and were present in large numbers by P12; macrophages with a VAM1  
25 phenotype only clearly appeared at day P14 (Fig. 2J, top row – purple and green arrowheads  
26 respectively).

27  
28 Finally, these developmental differences among VAM1 and VAM2 led us to investigate whether  
29 the increase in Tim4<sup>HIGH</sup>MHCII<sup>HIGH</sup> VAMs in *Maf* deficient mice (see Fig. 1E, F) was due to an  
30 early impact of *Maf* ablation in developing VAMs. In contrast to WT littermates, *Csf1r<sup>Cre</sup>Maf<sup>F/F</sup>*  
31 pups at P10 already displayed VAMs with an unusual Tim4<sup>HIGH</sup>MHCII<sup>HIGH</sup> phenotype observed in  
32 adult conditional *Maf*-deficient mice (Fig. 2J, bottom row - arrows). These data point to an  
33 important role for c-MAF early in the establishment of VAM2s cell identity.

34

35

## 1 **VAM-like *Maf*-dependent perivascular macrophages are found in the brain and gut.**

2 To further understand if the CD38<sup>+</sup> LYVE1<sup>+</sup> FOLR2<sup>+</sup> CD206<sup>HIGH</sup> phenotype was a peculiarity of  
3 eWAT VAMs or a general feature of perivascular macrophages we investigated the brain, large  
4 and small intestine. Interestingly, we found prominent vascular-associated macrophages  
5 populations in the brain and gut that share the same markers (Fig. 3A-C, fig. S3A-C and fig.  
6 S4A-C).

7  
8 In the brain, non-microglial macrophages have been collectively referred to as Border-  
9 Associated Macrophages (BAMs)(23, 48) and represent approximately 10% of the all brain  
10 macrophages (microglia and non-microglial macrophages)(49). We found that adult brain BAMs  
11 can be divided into CD38<sup>HIGH</sup>MHC class II<sup>LOW</sup>CD206<sup>HIGH</sup> (BAMs CD206<sup>HIGH</sup>) and  
12 CD38<sup>INT/LOW</sup>MHC class II<sup>HIGH</sup>CD206<sup>LOW</sup> (BAMs CD206<sup>LOW</sup>) macrophages (Fig. S3A, B). These  
13 shared with VAMs high expression levels of LYVE1, Folr2, CD38, TIM4 and CD206 and a lower  
14 expression of CD45 (Fig. S3B, C). Light-sheet microscopy of cleared brains revealed that  
15 CD206<sup>+</sup> BAMs were distributed along vessels in the brain cortex, following the vasculature from  
16 the meninges into the parenchyma (Fig. 3A). BAMs display clear differences in morphology as  
17 well as localization in relation to microglia (Fig. 3B); while microglia display their classical  
18 ramified morphology; BAMs are elongated, with an extended surface contacting blood vessels  
19 (Fig. 3B).

20  
21 The intestine contains macrophages that are associated with enteric nervous system plexuses  
22 as well as vasculature(50-53). We found that the large intestine harbors cells that resemble  
23 VAMs in the eWAT. Cells similar to VAM2 CD38<sup>+</sup>Folr2<sup>HIGH</sup>CD206<sup>HIGH</sup>MHCII<sup>LOW</sup> (VAM2 Li) and  
24 VAM1 CD38<sup>+</sup>Folr2<sup>HIGH</sup>CD206<sup>HIGH</sup>MHCII<sup>HIGH</sup> (VAM1 Li) were clearly distinguishable among the  
25 macrophage populations (Fig. S4A, B). The CD206<sup>HIGH</sup> populations (VAM2 Li and VAM1 Li)  
26 comprise around 50% of the CD38<sup>+</sup> macrophages in the large intestine (Fig. S4A, B) and are  
27 mainly located in tight association with blood vessels (Fig. 3C) and around enteric-associated  
28 neurons (EANs) (Fig. S4C, D). We observed a similar CD206<sup>HIGH</sup> population in the ileum  
29 muscularis externa layer as well (Fig. S4E); however only the VAM1 related phenotype could be  
30 observed in the small intestine (Data not shown). Besides sharing flow cytometry markers and  
31 morphological features, the CD206<sup>HIGH</sup> macrophages in the Brain and Large intestine also  
32 display a high endocytic capacity for blood-borne macromolecules (Fig. S3D and fig.S4F),  
33 although with kinetic differences between the different organs.

34

1 The high similarity shared by all perivascular macrophages in all organs analyzed together with  
2 the recent demonstration that BAMs CD206<sup>HIGH</sup> express high levels of *Maf*(23) led us to verify  
3 whether the *Maf* dependence observed in the eWAT is also present in other tissues. Similar to  
4 what we observed in eWAT, *Maf* gene deletion with all three Cre drivers caused a profound  
5 reduction in numbers of BAMs CD206<sup>HIGH</sup> in the adult brain (Fig. 3D). In this case however, we  
6 did not find the emergence of a distinct compensatory population. Using *Csf1r*<sup>Cre</sup>, which is  
7 expressed in yolk sac EMP, we could assess the effect in brains of neonatal mice (P5). Indeed,  
8 BAM CD206<sup>HIGH</sup> macrophages were completely absent, without any detectable compensation of  
9 the missing macrophages by BAMs CD206<sup>LOW</sup> (Fig. S3E). Thus, *Maf* gene deletion causes an  
10 early ablation of BAMs CD206<sup>HIGH</sup> in the brain. As animals aged with the continuous *Maf*-  
11 dependent ablation of BAMs CD206<sup>HIGH</sup>, monocytes began to enter the brain. While the number  
12 of BAMs CD206<sup>HIGH</sup> remained always exceedingly low, there was an expansion in BAMs  
13 CD206<sup>LOW</sup> macrophages that gradually increased in proportion and number (Fig. 3E). As  
14 expected by their low *Maf* expression, microglia numbers were unaffected at all ages (Fig. 3E  
15 and fig. S3E). Other myeloid cell types in eWAT and brain were not consistently affected by all  
16 three Cre drivers of *Maf*<sup>F/F</sup>, although there were some Cre-specific changes of unclear  
17 significance (Fig. S3F). Finally, the impact of *Maf* gene deletion on brain BAMs CD206<sup>HIGH</sup> can  
18 be observed in whole brain cleared images (Fig. 3G and fig. S3G).

19  
20 In the large intestine, *Maf* deletion also resulted in profound changes in macrophage  
21 populations. With all three Cre drivers, as observed in the eWAT, the VAM2 Li disappeared (Fig.  
22 3D and fig. 3F) and a significant increase in the numbers of CD206<sup>LOW</sup> macrophages is  
23 observed (Fig. 3f). The numbers of VAM1 Li and CD38<sup>-</sup> macrophages were mostly unaffected  
24 (Fig. 3F and fig. S4G). Finally, we observed that all CD206<sup>HIGH</sup>FOLR2<sup>+</sup> macrophages were  
25 absent in the small intestine muscularis (Fig. S4H). These data indicate that, in both large and  
26 small intestine, c-MAF plays a fundamental role controlling the CD206<sup>HIGH</sup> macrophages  
27 populations of perivascular macrophages. Overall, these analyses establish a crucial role for c-  
28 MAF in the establishment and transcriptional programming of perivascular macrophages across  
29 tissues.

30

### 31 ***Maf* ablation in perivascular macrophages increases the eWAT vascular network**

32 We next studied in detail the phenotype caused by *Maf* deletion in eWAT VAMs. Because VAMs  
33 are juxtaposed to blood vessels we first evaluated the eWAT vascular network. *Maf* ablation with  
34 all three Cre drivers resulted in augmented vascular branching in the eWAT, as manifest by  
35 increased blood “vessel surface area” (Fig. 4A, B). The increase in vascular branching was

1 mostly observed in the capillaries in eWAT pads and could be detected in young 5 week-old  
2 mice (Fig. 4C). Comprehensive morphological characterization indicated that the increased  
3 vascular surface area was unlikely due to an overall reduced adipocyte size or any other eWAT  
4 gross abnormality (Fig. S5A, B). Despite the alterations in the eWAT vasculature and in VAM  
5 gene expression upon *Maf* ablation, the capacity of eWAT VAMs to rapidly uptake blood-borne  
6 macromolecules was preserved (Fig. 4D). To assess whether the *Maf* gene itself was  
7 responsible for excessive vascular branching in the eWAT, or whether increased branching was  
8 the result of the altered VAM phenotype, we crossed *Lyve1<sup>Cre</sup>* with *Csf1r<sup>F/F</sup>* mice. The resulting  
9 mice had the *Maf* gene unaltered, and VAMs (that are LYVE1<sup>+</sup>) lacked the important gene  
10 *Csf1r(54, 55)*, which is not expressed by LEC. VAMs were reduced in *Lyve1<sup>Cre</sup>Csf1r<sup>F/F</sup>* mice by  
11 approximately 2 fold (VAM2) and 3 fold (VAM1) (Fig. 4E). However, the over-representation of  
12 Tim4<sup>HIGH</sup>MHCII<sup>HIGH</sup> VAMs, so prominent in *Maf* gene deleted VAMs (see Fig. 1E, F), did not  
13 occur in *Lyve1<sup>Cre</sup>Csf1r<sup>F/F</sup>* mice, supporting a specific role for *Maf* in this effect (Fig. 4E).  
14 Nevertheless, *Lyve1<sup>Cre</sup>Csf1r<sup>F/F</sup>* mice also had increased vascular branching (Fig. 4F, G),  
15 indicating that different genetic perturbations in the VAM compartment can impact eWAT blood  
16 vessel architecture. Moreover, the fact that these phenotypes were observed in four  
17 complementary conditional knockout models that share VAMs as the only common target (Fig.  
18 1D) strengthens the possibility of a VAM-specific function in regulating vascular branching in the  
19 eWAT.

20

## 21 ***Maf* deletion in macrophages protects mice from HFD-induced metabolic syndrome**

22 Perivascular macrophages from *Maf*-deficient mice displayed up regulation of important  
23 metabolic genes such as *ApoE*, *Hmox* and *Hif3a* that could exert a role in lipid and oxygen  
24 metabolism (see Fig. 1G, H). Several reports have indicated that metabolic syndrome in a  
25 hypercaloric setting develops concomitantly with increasing levels of circulating cholesterol (high  
26 LDL), triglycerides and with an increase in adipocyte hypertrophy and hypoxia(56, 57).Hence,  
27 we opted to test their susceptibility to the metabolic syndrome by feeding them with HFD (Fig.  
28 5A). After 11 weeks of HFD WT littermate controls showed higher fasting glucose serum levels  
29 and began started to develop glucose intolerance assessed by glucose tolerance test (GTT),  
30 while *Csf1r<sup>Cre</sup>Maf<sup>F/F</sup>* mice were protected from it, not showing any significative difference in  
31 relation to Normal Diet (ND) fed counterparts (Fig. 5B, C). The GTT was performed after a 16  
32 hours fast, a time point that gathers information about hepatic glucose metabolism and insulin  
33 sensitivity (58). Moreover, while ND-fed *Csf1r<sup>Cre</sup>Maf<sup>F/F</sup>* mice gained weight similarly to WT  
34 counterparts (Fig. 5D, E), HFD-fed *Csf1r<sup>Cre</sup>Maf<sup>F/F</sup>* mice gained less weight than HFD-fed  
35 littermates, and their fat pads were smaller (Fig. 5D, E). Consistently with weight and GTT data,  
36 serum triglycerides, which were elevated in littermates fed HFD, were not increased in HFD-fed

1 *Csf1r<sup>Cre</sup>Maf<sup>F/F</sup>* mice (Fig. S6A, B). Additionally, Pyruvate Tolerance Test (PTT) did not reveal  
2 differences in gluconeogenesis between *Csf1r<sup>Cre</sup>Maf<sup>F/F</sup>* and littermate controls (Fig. S6C).  
3 Furthermore, the two groups displayed similar increase in the circulating triglyceride levels upon  
4 intragastric olive oil gavage (Fig. S6D, E), suggesting that the improvements in metabolic  
5 parameters observed in *Csf1r<sup>Cre</sup>Maf<sup>F/F</sup>* mice is not due to abnormalities in the hepatic glucose  
6 metabolism or intestinal lipid uptake.

7  
8 Our previous studies showed that VAMs in HFD-fed WT mice have diminished endocytic  
9 capacity compared to littermates fed normal diet(15). This capacity was also rescued in *Maf*-  
10 deficient VAMs (Fig. 5F, G). At the cellular level, the most striking change in the adipose tissue  
11 macrophages related to HFD feeding in WT mice was the dramatic increase of BM derived  
12 CD11c<sup>+</sup> DP macrophages(12, 15), which constitute only a minor fraction of macrophages in mice  
13 fed normal diet. This population did not increase in *Csf1r<sup>Cre</sup>Maf<sup>F/F</sup>* mice upon HFD (Fig. 5H).  
14 Furthermore, other myeloid cells that have numbers highly increased in HFD-fed mice, such as  
15 Ly6C<sup>HIGH</sup> monocytes (Mon), Ly6C<sup>LOW</sup> monocytes and CD11b<sup>-</sup> dendritic cells, were also found at  
16 normal levels in HFD-fed *Csf1r<sup>Cre</sup>Maf<sup>F/F</sup>* mice (Fig. S6F). In conclusion, induction of obesity by  
17 HFD, cellular parameters of adipose tissue inflammation, and systemic markers of metabolic  
18 syndrome were prevented by ablation of the *Maf* gene in *Csf1r* expressing cells. To our  
19 knowledge this is the first study that demonstrates that embryonically derived VAMs can  
20 contribute to the pathogenesis of metabolic syndrome. These results define a major role for c-  
21 MAF in the transcriptional programming and function of perivascular macrophages; additionally,  
22 they reveal a novel role for these cells in the metabolic syndrome.

23

## 24 **DISCUSSION**

25 We found that c-MAF is an essential regulator of embryonically derived perivascular  
26 macrophages identity in different organs *in vivo*. Key transcription factors have been identified  
27 previously in other macrophage populations; for example c-Fos was shown to regulate the  
28 osteoclast lineage(59), Gata-6 to regulate peritoneal cavity macrophages(60-62), and Spi-C for  
29 red pulp macrophages(63). The present study defines an essential role for c-MAF in the normal  
30 transcriptional program and function of perivascular macrophage *in vivo*, also revealing useful  
31 genetic approaches that allow for their examination.

32

33 c-MAF is part of the of large Maf family of transcription factors that also include MAFA, MAFB,  
34 and Nrl (29, 64-68). Among them only MAFB and c-MAF have been reported to be expressed by  
35 myeloid cells ((24, 25, 69-71) and Immgen). Despite their significant homology, there is little



1 redundancy between the activity of MAFB and c-MAF in myeloid cells. MAFB directly controls  
2 the epigenetic landscape of self-renewing genes, limiting the proliferation rate of myeloid cells  
3 (69, 72). In addition, it was observed that MAFB limits the ability of M-CSF to differentiate  
4 hematopoietic stem cells towards the myeloid program (70). MAFB can also impact the function  
5 of macrophages in several pathological models (73-76). In the context of metabolic disease,  
6 animals harboring MAFB-deficient macrophages were shown to be more susceptible to obesity  
7 in a hyper caloric setting (75), an opposite phenotype from our model targeting c-MAF in  
8 macrophages under high fat diet. Indeed, others and we reported distinct outcomes in the  
9 macrophages transcriptional landscape upon ablation of c-MAF versus MAFB (27, 30), however,  
10 further studies are necessary to unveil the gene regulatory networks directly associated with  
11 these distinct outcomes in pathological models. Finally, while MAFB ablation seems to not  
12 impact the macrophages cell identity (69, 70, 72-76), we were able to show for the first time *in*  
13 *vivo* that c-MAF defines the identity of embryonically derived perivascular macrophages, such as  
14 VAM2.

15  
16 Macrophages adapt to the tissue environment in which they reside, and are, therefore, different  
17 in every tissue(4, 43, 77). Nevertheless, we showed that perivascular macrophages in several  
18 tissues and organs share key phenotypic and functional properties. The relationship between  
19 macrophages and vascular development has been previously addressed. During programmed  
20 vascular regression in the developing retina, macrophages induce apoptosis of the endothelial  
21 cells and clear the resulting debris(78, 79). In the regression of the pupillary vasculature, it was  
22 reported that macrophages directly engulf membranes of endothelial cells(80). In the fetal testis,  
23 macrophages mediate vascular reorganization, driving pruning and angiogenesis(81). Our data  
24 suggest a direct participation of VAMs in the control of eWAT vasculature development,  
25 revealing yet another fundamental functional activity ascribed to macrophages in animal  
26 organogenesis(2-7, 82). In addition, the increase in the eWAT vascular density upon ablation of  
27 c-MAF in VAMs may be associated with the protection from early signs of metabolic syndrome  
28 as recently shown (83). By identifying c-MAF as a key transcription factor of perivascular  
29 macrophages, we provide a genetic target to carry out further mechanistic studies into the role of  
30 this macrophage subpopulation in the establishment and maintenance of eWAT normal  
31 vasculature.

32  
33 The striking improvement in obesity and metabolic parameters with manipulation of *Maf* levels in  
34 macrophages indicates an important role for tissue resident, embryonically derived, perivascular  
35 macrophages in the pathogenesis of obesity-related disease. Historically, the development of  
36 diet induced metabolic syndrome is ascribed to the remarkable increase in numbers of bone



1 marrow derived CD11c<sup>+</sup> (DPs) macrophages within the eWAT (12, 84). To determine whether  
2 HFD-induced insulin resistance was caused by CD11c<sup>+</sup> macrophages, CD11c-DTR (diphtheria  
3 toxin receptor) was used to ablate all CD11c<sup>+</sup> cells, including fat DP macrophages, after  
4 diphtheria toxin (DT) administration. This treatment resulted in a reduction of HFD-caused WAT  
5 macrophage numbers and crown-like structures, and importantly, also caused an improvement  
6 of glucose and insulin sensitivity(85). However, some caveats of these experiments have been  
7 appreciated: 1) CD11c-DTR mice ablate many more cell types than CD11c<sup>+</sup> macrophages upon  
8 DT administration, affecting both innate and adaptive immunity; 2) The authors also showed that  
9 DT had a beneficial impact on mice that did not express the DTR, an “off target” impact that has  
10 now been recognized in these mice; 3) As we showed, VAMs (not DP) have a remarkable  
11 capacity to endocytose blood-borne macromolecules, including proteins. It is therefore possible  
12 that some of the off-target events are caused by the DT taken up by VAMs, following death  
13 without the need of a DTR.

14

15 Our data suggests that the *Maf*-dependent VAMs contribute to the massive inflow of monocyte-  
16 derived CD11c<sup>+</sup> DP macrophages into eWAT of HFD-fed mice, as well as the key glucose  
17 tolerance parameters. We previously showed that during chronic HFD feeding, WT VAMs had a  
18 significant impairment in their endocytic capacity, and their typical morphology curling around  
19 blood vessels, was lost(15). In contrast, *Maf* deficiency preserved the high endocytic capacity of  
20 VAMs, even during HFD feeding. It is thus possible that the abnormal VAMs in WT mice are the  
21 cause of the CD11c<sup>+</sup> DP infiltration, which contributes to metabolic syndrome. Determining the  
22 molecular mechanisms deployed by eWAT VAMs to this phenotype, and if they contribute  
23 directly or indirectly to it remains a hurdle due to the intrinsic difficulty to manipulate macrophage  
24 subtypes in an organ specific manner. In light of our findings, further development of tools to  
25 specifically manipulate subpopulations of macrophages may be crucial to refining our  
26 understanding about the contribution of VAMs to the vasculature architecture and systemic  
27 metabolism, which may in turn further the establishment of new therapeutic approaches to treat  
28 metabolic syndrome.

29

## 30 **MATERIALS AND METHODS**

### 31 **Mice.**

32 C57BL/6J (000664), *Lyve1*<sup>Cre</sup> (012601), *LySM*<sup>Cre</sup> (04781), *Csf1r*<sup>Cre</sup> (021024), *Csf1r*<sup>FLOX</sup> (021212)  
33 and *CCR2*<sup>RFP</sup> (017586) strains were purchased from Jackson laboratories. C57BL/6 CD45.1  
34 (564) animals were purchased from Charles River. *Cx3cr1*<sup>CRE-ERT2-YFP</sup> x *Rosa26*<sup>LSL-DsRed</sup> was a  
35 kind gift of Wenbiao Gan and Dan Littman Lab (44). *Maf*<sup>FLOX</sup> strain was previously described(34)  
36 and kindly provided by C. Birchmeier. Adult mice at age of 12-16 weeks old were used in the

1 study unless otherwise stated in the Figures. High-fat diet (HFD)-fed male mice were treated  
2 with a HFD for at least 11 weeks starting at 4-6 weeks of age. Mice were fed standard chow  
3 providing 17% calories from fat (LabDiet Formulab 5008) or a HFD providing 60% calories from  
4 fat (Research Diets, D12492i). Glucose tolerance test was performed as described before(58).  
5 Briefly, animals were submitted to 16hr fasting. After that, 1g/Kg of glucose was injected i.p. and  
6 blood glucose levels were measured as depicted in the figures. Time 0 is right before glucose  
7 injection. Blood glucose was determined with a One Touch Basic glucometer (Lifescan, Milipitas,  
8 California). Pyruvate tolerance test was performed after fasting animals for 16hr. One gram/Kg  
9 of sodium pyruvate (Sigma-Aldrich, P5280) was injected i.p. and blood glucose levels were  
10 measured as depicted in the figure. Time 0 is right before pyruvate injection. Blood glucose was  
11 determined as described above. Mice were sacrificed by CO<sub>2</sub> euthanasia and serum was  
12 collected when necessary. Serum analyses (Expanded tox panel #60514) were conducted by  
13 IDEXX Bioanalytics (North Grafton, MA). Whenever indicated, mice were treated i.v. with 1mg/kg  
14 of OVA-A647 (Thermofisher, O34784). For timing of embryonic development, mice were crossed  
15 at night, the following day a positive vaginal plug was considered as E0.5. At E9.5 recombination  
16 was induced by treatment of pregnant females by gavage with a single dose of 2.5 mg tamoxifen  
17 (Sigma) and 1.75 mg progesterone (Sigma) to counteract the mixed oestrogen agonist effects of  
18 tamoxifen, which can result in fetal abortions. Animals were housed at NYU Medical Center  
19 Animal Facility under SPF conditions. All procedures were approved by New York University  
20 School of Medicine Institutional Animal Care and Use Committee.

21

## 22 **Human Visceral Adipose tissue Sections**

23 Anonymous Human visceral adipose tissue was obtained from individuals submitted to bariatric  
24 surgery at NYU Langone Tisch Hospital. The samples were considered surgical waste during  
25 the procedure. Samples were processed as described below for flow cytometry or fixed  
26 overnight at 4°C with 4%PFA for imaging purposes.

27

## 28 **Adipose tissue stromal vascular fraction (SVF) purification**

29 To isolate leukocytes from adipose tissue mice were anesthetized with a mixture containing  
30 12.5mg/mL ketamine, 2.5mg/mL xylazine, and 25 mg/mL acepromazine and intracardially  
31 perfused with PBS with 5 mM EDTA. After dissection, the eWAT was minced and incubated for  
32 35 min at 37°C under gentle agitation (150rpm) in cRPMI (2% BSA FFA-free [Fisher  
33 BP9704100], 1mM of Sodium Pyruvate [Gibco, 11360-070], Glutamax 1x [Gibco, 35050-061],  
34 MEM non-essential amino acids [Gibco, 11140-050], Hepes [Gibco, 15630-080], Pen Strep  
35 [Gibco, 15140-122] and RPMI [Gibco, 21870-076]) containing 1mg/mL of collagenase type VIII  
36 (Sigma-Aldrich, C2139) and 100ug/mL of DNase I (Sigma-Aldrich, 10104159001). After  
37 digestion, the suspension was washed with ice-cold cRPMI and spun down. The floating fat

1 layer was removed and the leukocyte-enriched pellet was resuspended in cRPMI and filtered  
2 through a 100  $\mu$ m cell strainer.

3  
4 **Isolation of mononuclear cells from brain**  
5 Mice were perfused as described. Brain was separated from skull cap, minced and digested with  
6 PBS 1X containing 5% FBS, 1 mM HEPES and 240 U/mL collagenase D (Sigma-Aldrich) at 37°C  
7 for 35 min under gentle agitation (150rpm). Brain digestion was stopped by adding 10 mM EDTA  
8 for 5 min at 37°C. Digested brain was then homogenized, filtered through a 70  $\mu$ m cell strainer  
9 (BD Biosciences) and centrifuged at 1800 rpm for 10 min at 4°C. Next, cell pellet was  
10 resuspended in 38% Percoll (Sigma-Aldrich) and centrifuged at 2000 rpm for 30 min at RT.  
11 Following centrifugation, supernatant containing myelin was carefully aspirated and the pellet  
12 containing mononuclear cells was used for flow cytometry.

13  
14 **Isolation of mononuclear cells from gut**  
15 **Small intestine.** For the small intestine the distal half (jejunum and ileum) was harvested.  
16 Firstly, we removed the mesentery and Peyer's patches. Small intestine was then cut open  
17 longitudinally and washed with PBS 1X to remove luminal contents. Epithelial layer was  
18 removed by incubating the tissue once with 1M DTT+10mM HEPES in PBS 1X for 10 min and  
19 twice with 30mM EDTA+10mM HEPES in PBS 1X for 15 min. All incubations were performed at  
20 37°C in a mild motion (150rpm) and followed by intense shake of the samples. The samples  
21 were then washed with PBS 1X, minced and digested with RPMI containing 10% FBS, 0.01 M  
22 HEPES, 400 U/mL collagenase D and 0.1 mg/mL DNase I for 45 min at 37°C. Digested samples  
23 were homogenized, filtered through a 100  $\mu$ m nylon mesh and centrifuged at 2000 rpm for 10  
24 min at 4°C to obtain the mononuclear cells.

25 **Large intestine.** The whole large intestine was obtained from anal region up to caecum, and  
26 then the mesentery and feces were removed. The luminal side of the large intestine was  
27 exposed using a polyethylene tube (8 cm) tightly attached in both boundaries of the intestine  
28 and then the epithelial layer was removed as described for the small intestine. Next, the large  
29 intestine was minced and digested in RPMI containing 2% BSA, 0.01 M HEPES, 0.2 mg/mL  
30 collagenase VIII, 0.1 mg/mL DNase I and 5  $\mu$ g/mL dispase for 25 min at 37°C. Digested  
31 samples were then homogenized, filtered through a 100  $\mu$ m cell strainer and centrifuged at 2000  
32 rpm for 10 min at 4°C to obtain mononuclear cells.

33  
34 **Intestine muscularis dissections.**  
35 Mice were sacrificed by cervical dislocation and the small intestine ileum (1 cm moving proximal  
36 from the ileocecal junction, 6 cm length), or colon (1.5 cm moving distal from cecum and 4 cm  
37 moving proximal from the rectum, 6 cm length) was removed. For dissection of the muscularis,

1 the intestinal tissue was then placed on a chilled aluminum block with the serosa facing upward.  
2 Curved forceps were then used to carefully remove the muscularis from the mucosa in one  
3 intact piece.

#### 5 **Kidney Capsule eWAT transplant**

6 The eWAT of 5-days old donor mice (P5) was harvested and grafted under the kidney capsule  
7 of isoflurane anaesthetized 10-week-old congenic recipient mice using a procedure previously  
8 described (86). One fat lobe was grafted per kidney. Sixty days post transplant, host animals  
9 were sacrificed, the engrafted eWAT was recovered and processed individually as described  
10 above.

#### 12 **Intestinal fat absorption assay**

13 Intestinal fat absorption assay was performed as described before (87). In brief, 8-14-week-old  
14 male mice were fasted for 6 hrs and received 200 µl olive oil by intragastric gavage, with  
15 administration of Triton WR1339 (Sigma, T0307; 0.5 g/kg, i.p.), 30 min prior to gavage. Blood  
16 from retro-orbital plexus was collected before gavage and at 1, 2, 3, 4 hr after gavage. Serum  
17 triglycerides were measured with the Triglyceride Colorimetric Assay Kit (Cayman, #10010303).

#### 19 **Antibodies and fluorescent conjugates**

20 Antibodies were purchased from BD-biosciences: Anti-Mouse CD45 (clone 30-F11) BUV 395;  
21 Anti-Mouse SiglecF (clone E50-2440) APC-R700; Anti-Mouse TIM4 (Clone RMT4-54) BUV395;  
22 Streptavidin-BUV395. Thermofisher: Anti-Mouse CD11b (clone M1/70) APC-E780; Anti-Human  
23 CD45 (clone 2D1) APC-E780; Anti-Mouse CD249 (Clone 6C3) Biotin; Anti-Mouse LYVE1 (clone  
24 ALY7) Biotin; Anti-Mouse TIM4 (Clone RMT4-54) PE and Percp-E710; Donkey Anti-Rabbit A568  
25 (A10042); Ovalbumin-A647, O34784; Bodipy 493/503, D3922; 4',6-diamidino-2-phenylindole  
26 (DAPI), D3571 or Live/dead fixable blue, L34961 were used to exclude dead cells. Biolegend:  
27 Anti-Mouse CD11c (clone N418) A647, BV421, BV510 and BV650; Anti-Human CD14 (clone  
28 HCD14) PE-CY7; Anti-Human CD16 (clone3G8) A700; Anti-Mouse CD19 (clone 1D3) FITC;  
29 Anti-Mouse CD31 (clone 390) A488 and BV421; Anti-Mouse CD38 (clone 90) A647; Anti-Mouse  
30 CD45 (clone 30-F11) A700; Anti-Human CD45 (clone 2D1) A700; Anti-Mouse CD64 (clone x54-  
31 5/7.1) APC, PE, PE/DAZZLE594, BV421 and Biotin; Anti-Human CD64 (clone 10.1) FITC; Anti-  
32 Human CD163 (clone GHI/61) BV421; Anti-Mouse CD206 (clone C068C2) A647, PE-CY7 and  
33 PE/DAZZLE594; Anti-Human CD206 (clone 15-2) A647; Anti-Mouse CX3CR1 (clone SA011F11)  
34 BV650; Anti-Mouse FOLR2 (clone 10/FR2) PE; Anti-Mouse I-A/I-E (clone M5/114.15.2) A488,  
35 Percp-Cy5-5, BV421 and BV711; Anti-Mouse Ly6C (clone HK1.4) A488, Percp-Cy5-5, A700 and  
36 BV510; Anti-Mouse Ly6G (clone 1A8) FITC; Anti-Mouse Thy1.2 (clone 30-H12) FITC; Anti-  
37 Mouse TIM4 (Clone RMT4-54) A647; Streptavidin-BV421; 405225. Abcam: Anti-Mouse LYVE1

1 (ab14917); Anti-Human CD31 (AB32457); Donkey Anti-Goat A568 (AB175704); R&D: Anti-  
2 Mouse CD31 (AF3628); Anti-Mouse LYVE1 (AF2125); Anti-Human LYVE1 (AF2089). Jackson  
3 ImmunoResearch: Donkey Anti-Rat A647 (712-605-153); Donkey Anti-Rat BV421 (712-675-153),  
4 Donkey Anti-Goat A488 (705-545-147); Donkey Anti-Goat A647 (705-605-147); Normal Donkey  
5 Serum (017-000-121). WAKO: Anti-Mouse IBA1 (019-19741). Human polyclonal Anti-Hu  
6 (ANNA-1) was a kind gift from V. Lennon.

7

## 8 **Flow cytometry and cell sorting**

9 Flow cytometry data were acquired on an LSR-II flow cytometer (Becton Dickinson) and  
10 analyzed using FlowJo software (Tree Star 8.7). All stainings were performed as recommended  
11 by the antibody manufacturer. All samples were pre incubated with Fc block (2.4G2, BE0307  
12 bioxcell) for 15 min at 4°C. FACS sorting was performed using an ARIA II sorter using a 100µm  
13 nozzle (Beckton Dickinson). Flow cytometry of adipose tissue macrophages is made somewhat  
14 difficult because of their high autofluorescence. To minimize the impact of autofluorescence, we  
15 meticulously selected the fluorochromes for each cell marker, and used fluorescence minus one  
16 controls (FMOs).

17

## 18 **Bone marrow chimeras**

19 Recipient mice were lethally irradiated (1000 rads) and reconstituted with bone marrow cells  
20 from mice as depicted in the figures. After 2 months, mice were sacrificed, and organs of interest  
21 analyzed.

22

## 23 **RNA isolation and sequencing**

24 Total RNA from sorted target cell populations was isolated using TRIzol LS (Invitrogen;  
25 10296010) followed by DNase I (Qiagen, 79254) treatment and cleanup with RNeasy Plus Micro  
26 kit (Qiagen, 74034). RNA quality was assessed using pico bioanalyser chips (Agilent, 5067-  
27 1513). Only RNAs displaying a RNA integrity number (RIN) of 9 or higher were used for  
28 downstream procedures. RNAseq libraries were prepared using the Nugen Ovation Trio low  
29 input RNA Library Systems V2 (Nugen; 0507-08) according to the manufacturer's instructions by  
30 the NYU Genome Technology Center. Pooled libraries were sequenced as 50 nucleotide,  
31 paired-end reads on an Illumina NextSeq 500 using v4 chemistry.

32

## 33 **RNAseq data quality assessment and visualization**

34 Illumina sequencing adapters and reads with Phred quality scores lower than 20 were removed  
35 with Trimmomatic. Trimmed reads were mapped to the *Mus musculus* genome Ensembl  
36 annotation release 91 using STAR v2.5.3a with default settings. The number of reads uniquely

1 mapping to each gene feature in the corresponding annotation file was determined using  
2 featureCounts. The resulting count tables were passed to R for further analyses.

3

#### 4 **Differential expression analysis and motif identification**

5 DESeq2 was used for differential expression analysis. Samples from different experiments  
6 performed on different days were analyzed separately. Consistency between replicates was  
7 checked using principal component analysis (PCA) and Euclidean distance-based hierarchical  
8 clustering on normalized counts. Genes with an average of less than 130 normalized counts  
9 across all samples were removed from volcano plots to visualize only the most highly expressed  
10 genes. Genes were considered significantly differential when the adjusted P value was less  
11 than 0.05.

12

#### 13 **Whole-mount intestine muscularis immunofluorescence.**

14 Following intestine dissection, the intestine muscularis tissue was pinned down on a Sylgard-  
15 coated plate, covered with PBS/4% PFA and fixed overnight at 4°C. Following tissue fixation,  
16 samples were washed in DPBS (minimum 4x 15min), followed by permeabilization in 0.5 %  
17 Triton X-100/0.05 % Tween-20/4 µg heparin (PTxwH) for a minimum of 2 hr at RT with gentle  
18 agitation. Samples were then blocked for 2 hr in blocking buffer (PTxwH with 5% donkey serum)  
19 for 2 hr at RT with gentle agitation. Primary antibodies were added to blocking buffer at  
20 appropriate concentrations and incubated for 2-3 days at 4°C. Following primary antibody  
21 incubation, samples were washed in PTxwH (minimum 4x 15min), followed by incubation with  
22 secondary antibody in PTxwH at appropriate concentrations overnight at 4°C. Following  
23 secondary antibody incubation, samples were again washed in PTxwH, and mounted with  
24 FluoroMount G on slides with 1 ½ coverslips. Slides were kept in the dark at 4°C until they were  
25 imaged(52).

26

#### 27 **Adipo-Clear of brain and eWAT**

28 Sample Collection: the method was performed as described before(35). Animals were  
29 anesthetized as described before and an intracardiac perfusion/fixation was performed with 1x  
30 PBS followed by 4% PFA. All harvested samples were post-fixed in 4% PFA at 4°C overnight.  
31 Fixed samples were washed in PBS for 1 hr three times at RT.

32

33 Delipidation and Permeabilization: fixed samples were washed in 20%, 40%, 60%, 80%  
34 methanol in H<sub>2</sub>O/0.1% Triton X-100/0.3 M glycine (B1N buffer, pH 7), and 100% methanol for  
35 1hr each. Sample were then delipidated with 100% dichloromethane (DCM; Sigma-Aldrich) for  
36 1h three times. After delipidation, samples were washed in 100% methanol for 1hr min twice,  
37 then in 80%, 60%, 40%, 20% methanol in B1N buffer for 1hr each step. All procedures above



1 were carried out at 4°C with shaking. Samples were then washed in B1N for 30 min twice  
2 followed by PBS/0.1% Triton X-100/0.05% Tween 20/2 µg/mL heparin (PTxwH buffer) for 1hr  
3 twice before further staining procedures.

4  
5 Immunolabeling: For Immunolabeling of the eWAT we used just the apical region of the  
6 epididymal lobe for staining. For the Brain, whole brain or half hemisphere (Sagittal cut) was  
7 stained. Samples were incubated in primary antibody dilutions in PTxwH for 4 days at RT. After  
8 primary antibody incubation, samples were washed in PTxwH for 5 min, 10 min, 15 min, 30 min,  
9 1 hr, 2 hr, 4 hr, and overnight, and then incubated in secondary antibody dilutions in PTxwH for  
10 4 days at RT. Samples were finally washed in PTwH for 5 min, 10 min, 15 min, 30 min, 1 hr,  
11 2 hr, 4 hr, and overnight.

12  
13 Tissue Clearing: samples were dehydrated in 25%, 50%, 75%, 100%, 100% methanol/H<sub>2</sub>O  
14 series for 30 min at each step at RT. Following dehydration, samples were washed with 100%  
15 DCM for 2hr twice, followed by an overnight clearing step in dibenzyl ether (DBE; Sigma-  
16 Aldrich). Samples were stored at RT in the dark until imaging.

17  
18 3D Imaging: Whenever indicated for whole-tissue imaging we used a light-sheet microscope  
19 (Ultramicroscope II, LaVision Biotec) equipped with 1.3X (used for whole-tissue views with low-  
20 magnification) and 4X objective lenses (used for high-magnification views) and an sCMOs  
21 camera (Andor Neo). Images were acquired with the InspectorPro software (LaVision BioTec).  
22 Samples were placed in an imaging reservoir filled with DBE and illuminated from the side by  
23 the laser light sheet. The samples were scanned with the 488 nm, 640 nm and 790 nm laser  
24 channels and with a step-size of 3 µm for 1.3x objective and 2.5 µm for 4x objective. For high  
25 magnification and measurement of eWAT vessel architecture clarified fat pieces and brain were  
26 placed in a µ-Slide 2 Well Glass Bottom (Ibidi, #80287) containing DBE as mounting media and  
27 imaged at room temperature on an inverted confocal microscope (Zeiss 710 MP; optical lenses  
28 20x N.A. 0.8 and 63x N.A. 1.4). For eWAT vessel architecture, 4 images per tissue/animal were  
29 acquired.

30  
31 Image Processing: All whole-tissue images were generated using Imaris x64 software (version  
32 9.2, Bitplane). 3D reconstruction was performed using the “volume rendering” function. The  
33 vessel surface area was obtained by using the Batch tool to process all images in an unbiased  
34 way. Briefly, all samples were submitted to a median filter and then, using the “Surfaces”  
35 algorithm as described by the manufacturer, the vascular tree was reconstructed for 50 µm z-  
36 stacks (each stack separated by 0.87 µm) and the vessel surface area obtained. Optical  
37 sections were generated using the “snapshot” tool.



1

## 2 **Confocal microscopy of neonatal WAT macrophages**

3 White adipose tissue was stained as described(88), with modifications. Mice were euthanized  
4 and slowly perfused by intracardiac injection with 20 mL of PBS/5mM EDTA. Epididymal fat  
5 pads were excised and fixed for 1h in PBS/1% paraformaldehyde with gentle shaking at 4°C.  
6 After that, samples were blocked for 1 h in PtxwH buffer (0.5 % Triton X-100/0.05 % Tween-20/4  
7 µg heparin) containing 5% Donkey serum (blocking buffer) with gentle rocking at room  
8 temperature. Primary antibodies were diluted in blocking buffer and added to fat samples for 3  
9 days at 4°C. Samples were then washed 6 times with cold PTxwH buffer (30min at 4°C each).  
10 After that samples were incubated with secondary antibodies for 3 days at 4°C. The tissue was  
11 washed again as described before and incubated with blocking buffer-diluted Bodipy  
12 (ThermoFisher # D3922) for 1h at room temp. Fat pads were imaged at room temperature on an  
13 inverted confocal microscope (Zeiss 710 MP; optical lenses 20x N.A. 0.8 and 63x N.A. 1.4) by  
14 placing the pad in Fluoromount-G (Southern Biotech, 0100-01) in a chambered coverslip. Zen  
15 software was used for image acquisition. ImageJ software, Fiji version 1.0 or Imaris/Bitplane  
16 software were used for contrast, brightness and pseudo-color adjustments.

17

## 18 **Histology**

19 Tissues were fixed in 4% paraformaldehyde and embedded in paraffin. Twenty-micrometre  
20 sections were stained with haematoxylin and eosin. Bright-field color images were acquired in a  
21 Zeiss Axio Observed using 20x magnification lenses (N.A. 0.8). The adipocyte diameter was  
22 measured using the ImageJ software.

23

## 24 **Statistical analysis**

25 Mean, SD and SEM values were calculated with GraphPad Prism (version 8.4.1, GraphPad  
26 Software). Error bars represent  $\pm$  SEM. Unpaired Student's *t* test was used to compare two  
27 variables. For 3 or more variables one way ANOVA was used with a turkey post test, as  
28 indicated in each figure legend. P-values < 0.05 were considered significant. Statistics symbols  
29 were determined as: \* =  $p < 0.05$ , \*\* =  $p < 0.01$  and \*\*\* =  $p < 0.001$ .

30

## 31 **Data and code availability**

32 Data generated by RNA sequencing are deposited in the NCBI Gene Expression Omnibus  
33 (GEO) database and are accessible under GEO: GSE148606. All software used is available  
34 online, either freely or from a commercial supplier.

35

## 36 **References**

37 1. C. Nathan, Metchnikoff's Legacy in 2008. *Nat Immunol* **9**, 695-698 (2008).

- 1 2. J. W. Pollard, Trophic macrophages in development and disease. *Nat Rev Immunol* **9**, 259-  
2 270 (2009).
- 3 3. T. A. Wynn, A. Chawla, J. W. Pollard, Macrophage biology in development, homeostasis  
4 and disease. *Nature* **496**, 445-455 (2013).
- 5 4. Y. Lavin, A. Mortha, A. Rahman, M. Merad, Regulation of macrophage development and  
6 function in peripheral tissues. *Nat Rev Immunol* **15**, 731-744 (2015).
- 7 5. Y. Okabe, R. Medzhitov, Tissue biology perspective on macrophages. *Nat Immunol* **17**, 9-17  
8 (2016).
- 9 6. E. G. Stamatziades *et al.*, Immune Monitoring of Trans-endothelial Transport by Kidney-  
10 Resident Macrophages. *Cell* **166**, 991-1003 (2016).
- 11 7. Y. Wolf *et al.*, Brown-adipose-tissue macrophages control tissue innervation and  
12 homeostatic energy expenditure. *Nat Immunol* **18**, 665-674 (2017).
- 13 8. A. Lapenna, M. De Palma, C. E. Lewis, Perivascular macrophages in health and disease.  
14 *Nat Rev Immunol* **18**, 689-702 (2018).
- 15 9. S. P. Weisberg *et al.*, Obesity is associated with macrophage accumulation in adipose  
16 tissue. *J Clin Invest* **112**, 1796-1808 (2003).
- 17 10. H. Xu *et al.*, Chronic inflammation in fat plays a crucial role in the development of obesity-  
18 related insulin resistance. *J Clin Invest* **112**, 1821-1830 (2003).
- 19 11. K. E. Wellen, G. S. Hotamisligil, Obesity-induced inflammatory changes in adipose tissue. *J*  
20 *Clin Invest* **112**, 1785-1788 (2003).
- 21 12. C. N. Lumeng, J. L. Bodzin, A. R. Saltiel, Obesity induces a phenotypic switch in adipose  
22 tissue macrophage polarization. *J Clin Invest* **117**, 175-184 (2007).
- 23 13. C. N. Lumeng *et al.*, Aging is associated with an increase in T cells and inflammatory  
24 macrophages in visceral adipose tissue. *J Immunol* **187**, 6208-6216 (2011).
- 25 14. A. Kosteli *et al.*, Weight loss and lipolysis promote a dynamic immune response in murine  
26 adipose tissue. *J Clin Invest* **120**, 3466-3479 (2010).
- 27 15. H. M. Silva *et al.*, Vasculature-associated fat macrophages readily adapt to inflammatory  
28 and metabolic challenges. *J Exp Med* **216**, 786-806 (2019).
- 29 16. A. Weinstock, H. Moura Silva, K. J. Moore, A. M. Schmidt, E. A. Fisher, Leukocyte  
30 Heterogeneity in Adipose Tissue, Including in Obesity. *Circ Res* **126**, 1590-1612 (2020).
- 31 17. N. Cox, F. Geissmann, Macrophage ontogeny in the control of adipose tissue biology. *Curr*  
32 *Opin Immunol* **62**, 1-8 (2020).
- 33 18. S. Chakarov *et al.*, Two distinct interstitial macrophage populations coexist across tissues in  
34 specific subtissular niches. *Science* **363**, (2019).
- 35 19. D. A. Hill *et al.*, Distinct macrophage populations direct inflammatory versus physiological  
36 changes in adipose tissue. *Proc Natl Acad Sci U S A*, (2018).
- 37 20. D. A. Jaitin *et al.*, Lipid-Associated Macrophages Control Metabolic Homeostasis in a  
38 Trem2-Dependent Manner. *Cell* **178**, 686-698 e614 (2019).
- 39 21. J. Vijay *et al.*, Single-cell analysis of human adipose tissue identifies depot and disease  
40 specific cell types. *Nat Metab* **2**, 97-109 (2020).
- 41 22. S. G. Utz *et al.*, Early Fate Defines Microglia and Non-parenchymal Brain Macrophage  
42 Development. *Cell* **181**, 557-573 e518 (2020).
- 43 23. H. Van Hove *et al.*, A single-cell atlas of mouse brain macrophages reveals unique  
44 transcriptional identities shaped by ontogeny and tissue environment. *Nat Neurosci* **22**,  
45 1021-1035 (2019).
- 46 24. S. Cao *et al.*, Differential regulation of IL-12 and IL-10 gene expression in macrophages by  
47 the basic leucine zipper transcription factor c-Maf fibrosarcoma. *J Immunol* **169**, 5715-5725  
48 (2002).
- 49 25. S. Cao, J. Liu, L. Song, X. Ma, The protooncogene c-Maf is an essential transcription factor  
50 for IL-10 gene expression in macrophages. *J Immunol* **174**, 3484-3492 (2005).
- 51 26. K. Kang *et al.*, Interferon-gamma Represses M2 Gene Expression in Human Macrophages  
52 by Disassembling Enhancers Bound by the Transcription Factor MAF. *Immunity* **47**, 235-  
53 250 e234 (2017).
- 54 27. M. Liu *et al.*, Transcription factor c-Maf is a checkpoint that programs macrophages in lung  
55 cancer. *J Clin Invest* **130**, 2081-2096 (2020).

- 1 28. J. I. Kim, T. Li, I. C. Ho, M. J. Grusby, L. H. Glimcher, Requirement for the c-Maf  
2 transcription factor in crystallin gene regulation and lens development. *Proc Natl Acad Sci U*  
3 *S A* **96**, 3781-3785 (1999).
- 4 29. S. Kawauchi *et al.*, Regulation of lens fiber cell differentiation by transcription factor c-Maf. *J*  
5 *Biol Chem* **274**, 19254-19260 (1999).
- 6 30. K. Kikuchi *et al.*, Macrophages Switch Their Phenotype by Regulating Maf Expression  
7 during Different Phases of Inflammation. *J Immunol* **201**, 635-651 (2018).
- 8 31. M. Nakamura *et al.*, c-Maf is essential for the F4/80 expression in macrophages in vivo.  
9 *Gene* **445**, 66-72 (2009).
- 10 32. E. Gomez Perdiguero *et al.*, Tissue-resident macrophages originate from yolk-sac-derived  
11 erythro-myeloid progenitors. *Nature* **518**, 547-551 (2015).
- 12 33. N. Yosef *et al.*, The phenotypic and functional properties of mouse yolk-sac-derived  
13 embryonic macrophages. *Dev Biol* **442**, 138-154 (2018).
- 14 34. H. Wende *et al.*, The transcription factor c-Maf controls touch receptor development and  
15 function. *Science* **335**, 1373-1376 (2012).
- 16 35. J. Chi *et al.*, Three-Dimensional Adipose Tissue Imaging Reveals Regional Variation in  
17 Beige Fat Biogenesis and PRDM16-Dependent Sympathetic Neurite Density. *Cell Metab*  
18 **27**, 226-236.e223 (2018).
- 19 36. K. Ali, M. Middleton, E. Pure, D. J. Rader, Apolipoprotein E suppresses the type I  
20 inflammatory response in vivo. *Circ Res* **97**, 922-927 (2005).
- 21 37. S. Kobayashi *et al.*, Hypoxia-inducible factor-3alpha promotes angiogenic activity of  
22 pulmonary endothelial cells by repressing the expression of the VE-cadherin gene. *Genes*  
23 *Cells* **20**, 224-241 (2015).
- 24 38. L. Elbarghati, C. Murdoch, C. E. Lewis, Effects of hypoxia on transcription factor expression  
25 in human monocytes and macrophages. *Immunobiology* **213**, 899-908 (2008).
- 26 39. G. Rackov *et al.*, p21 mediates macrophage reprogramming through regulation of p50-p50  
27 NF-kappaB and IFN-beta. *J Clin Invest* **126**, 3089-3103 (2016).
- 28 40. K. Asano, K. Kikuchi, M. Tanaka, CD169 macrophages regulate immune responses toward  
29 particulate materials in the circulating fluid. *J Biochem* **164**, 77-85 (2018).
- 30 41. J. Y. Bertrand *et al.*, Three pathways to mature macrophages in the early mouse yolk sac.  
31 *Blood* **106**, 3004-3011 (2005).
- 32 42. F. Ginhoux, M. Guilliams, Tissue-Resident Macrophage Ontogeny and Homeostasis.  
33 *Immunity* **44**, 439-449 (2016).
- 34 43. E. Mass *et al.*, Specification of tissue-resident macrophages during organogenesis. *Science*  
35 **353**, (2016).
- 36 44. C. N. Parkhurst *et al.*, Microglia promote learning-dependent synapse formation through  
37 brain-derived neurotrophic factor. *Cell* **155**, 1596-1609 (2013).
- 38 45. T. Kurihara, G. Warr, J. Loy, R. Bravo, Defects in macrophage recruitment and host defense  
39 in mice lacking the CCR2 chemokine receptor. *J Exp Med* **186**, 1757-1762 (1997).
- 40 46. N. V. Serbina, E. G. Pamer, Monocyte emigration from bone marrow during bacterial  
41 infection requires signals mediated by chemokine receptor CCR2. *Nat Immunol* **7**, 311-317  
42 (2006).
- 43 47. Y. Si, C. L. Tsou, K. Croft, I. F. Charo, CCR2 mediates hematopoietic stem and progenitor  
44 cell trafficking to sites of inflammation in mice. *J Clin Invest* **120**, 1192-1203 (2010).
- 45 48. D. Mrdjen *et al.*, High-Dimensional Single-Cell Mapping of Central Nervous System Immune  
46 Cells Reveals Distinct Myeloid Subsets in Health, Aging, and Disease. *Immunity* **48**, 380-  
47 395.e386 (2018).
- 48 49. M. J. C. Jordao *et al.*, Single-cell profiling identifies myeloid cell subsets with distinct fates  
49 during neuroinflammation. *Science* **363**, (2019).
- 50 50. P. A. Muller *et al.*, Crosstalk between muscularis macrophages and enteric neurons  
51 regulates gastrointestinal motility. *Cell* **158**, 300-313 (2014).
- 52 51. S. De Schepper *et al.*, Self-Maintaining Gut Macrophages Are Essential for Intestinal  
53 Homeostasis. *Cell* **175**, 400-415.e413 (2018).
- 54 52. F. Matheis *et al.*, Adrenergic Signaling in Muscularis Macrophages Limits Infection-Induced  
55 Neuronal Loss. *Cell* **180**, 64-78.e16 (2020).

- 1 53. P. A. Muller, F. Matheis, D. Mucida, Gut macrophages: key players in intestinal immunity  
2 and tissue physiology. *Curr Opin Immunol* **62**, 54-61 (2020).
- 3 54. X. M. Dai *et al.*, Targeted disruption of the mouse colony-stimulating factor 1 receptor gene  
4 results in osteopetrosis, mononuclear phagocyte deficiency, increased primitive progenitor  
5 cell frequencies, and reproductive defects. *Blood* **99**, 111-120 (2002).
- 6 55. C. Pridans *et al.*, Pleiotropic Impacts of Macrophage and Microglial Deficiency on  
7 Development in Rats with Targeted Mutation of the Csf1r Locus. *J Immunol* **201**, 2683-2699  
8 (2018).
- 9 56. J. M. Rutkowski, J. H. Stern, P. E. Scherer, The cell biology of fat expansion. *J Cell Biol*  
10 **208**, 501-512 (2015).
- 11 57. K. Sun, C. M. Kusminski, P. E. Scherer, Adipose tissue remodeling and obesity. *J Clin*  
12 *Invest* **121**, 2094-2101 (2011).
- 13 58. I. Bellantuono *et al.*, A toolbox for the longitudinal assessment of healthspan in aging mice.  
14 *Nat Protoc* **15**, 540-574 (2020).
- 15 59. A. E. Grigoriadis *et al.*, c-Fos: a key regulator of osteoclast-macrophage lineage  
16 determination and bone remodeling. *Science* **266**, 443-448 (1994).
- 17 60. E. L. Gautier *et al.*, Gata6 regulates aspartoacylase expression in resident peritoneal  
18 macrophages and controls their survival. *J Exp Med* **211**, 1525-1531 (2014).
- 19 61. Y. Okabe, R. Medzhitov, Tissue-specific signals control reversible program of localization  
20 and functional polarization of macrophages. *Cell* **157**, 832-844 (2014).
- 21 62. M. Rosas *et al.*, The transcription factor Gata6 links tissue macrophage phenotype and  
22 proliferative renewal. *Science* **344**, 645-648 (2014).
- 23 63. M. Kohyama *et al.*, Role for Spi-C in the development of red pulp macrophages and splenic  
24 iron homeostasis. *Nature* **457**, 318-321 (2009).
- 25 64. K. Kataoka, M. Noda, M. Nishizawa, Maf nuclear oncoprotein recognizes sequences related  
26 to an AP-1 site and forms heterodimers with both Fos and Jun. *Mol Cell Biol* **14**, 700-712  
27 (1994).
- 28 65. M. Nishizawa, K. Kataoka, N. Goto, K. T. Fujiwara, S. Kawai, v-maf, a viral oncogene that  
29 encodes a "leucine zipper" motif. *Proc Natl Acad Sci U S A* **86**, 7711-7715 (1989).
- 30 66. H. Ogino, K. Yasuda, Induction of lens differentiation by activation of a bZIP transcription  
31 factor, L-Maf. *Science* **280**, 115-118 (1998).
- 32 67. M. H. Sieweke, H. Tekotte, J. Frampton, T. Graf, MafB is an interaction partner and  
33 repressor of Ets-1 that inhibits erythroid differentiation. *Cell* **85**, 49-60 (1996).
- 34 68. T. Yoshida, T. Ohkumo, S. Ishibashi, K. Yasuda, The 5'-AT-rich half-site of Maf recognition  
35 element: a functional target for bZIP transcription factor Maf. *Nucleic Acids Res* **33**, 3465-  
36 3478 (2005).
- 37 69. A. Aziz, E. Soucie, S. Sarrazin, M. H. Sieweke, MafB/c-Maf deficiency enables self-renewal  
38 of differentiated functional macrophages. *Science* **326**, 867-871 (2009).
- 39 70. S. Sarrazin *et al.*, MafB restricts M-CSF-dependent myeloid commitment divisions of  
40 hematopoietic stem cells. *Cell* **138**, 300-313 (2009).
- 41 71. X. Wu *et al.*, MafB lineage tracing to distinguish macrophages from other immune lineages  
42 reveals dual identity of Langerhans cells. *J Exp Med* **213**, 2553-2565 (2016).
- 43 72. E. L. Soucie *et al.*, Lineage-specific enhancers activate self-renewal genes in macrophages  
44 and embryonic stem cells. *Science* **351**, aad5510 (2016).
- 45 73. M. Hamada *et al.*, MafB promotes atherosclerosis by inhibiting foam-cell apoptosis. *Nat*  
46 *Commun* **5**, 3147 (2014).
- 47 74. M. Hamada, Y. Tsunakawa, H. Jeon, M. K. Yadav, S. Takahashi, Role of MafB in  
48 macrophages. *Exp Anim* **69**, 1-10 (2020).
- 49 75. M. T. Tran *et al.*, MafB deficiency accelerates the development of obesity in mice. *FEBS*  
50 *Open Bio* **6**, 540-547 (2016).
- 51 76. M. T. N. Tran *et al.*, MafB is a critical regulator of complement component C1q. *Nat*  
52 *Commun* **8**, 1700 (2017).
- 53 77. D. Gosselin *et al.*, Environment drives selection and function of enhancers controlling tissue-  
54 specific macrophage identities. *Cell* **159**, 1327-1340 (2014).



- 1 78. I. B. Lobov *et al.*, WNT7b mediates macrophage-induced programmed cell death in  
2 patterning of the vasculature. *Nature* **437**, 417-421 (2005).
- 3 79. S. Rao *et al.*, Obligatory participation of macrophages in an angiopoietin 2-mediated cell  
4 death switch. *Development* **134**, 4449-4458 (2007).
- 5 80. R. A. Poche, C. W. Hsu, M. L. McElwee, A. R. Burns, M. E. Dickinson, Macrophages engulf  
6 endothelial cell membrane particles preceding pupillary membrane capillary regression. *Dev*  
7 *Biol* **403**, 30-42 (2015).
- 8 81. T. DeFalco, I. Bhattacharya, A. V. Williams, D. M. Sams, B. Capel, Yolk-sac-derived  
9 macrophages regulate fetal testis vascularization and morphogenesis. *Proc Natl Acad Sci U*  
10 *S A* **111**, E2384-2393 (2014).
- 11 82. H. He *et al.*, Perivascular Macrophages Limit Permeability. *Arterioscler Thromb Vasc Biol*  
12 **36**, 2203-2212 (2016).
- 13 83. M. R. Robciuc *et al.*, VEGFB/VEGFR1-Induced Expansion of Adipose Vasculature  
14 Counteracts Obesity and Related Metabolic Complications. *Cell Metab* **23**, 712-724 (2016).
- 15 84. M. T. Nguyen *et al.*, A subpopulation of macrophages infiltrates hypertrophic adipose tissue  
16 and is activated by free fatty acids via Toll-like receptors 2 and 4 and JNK-dependent  
17 pathways. *J Biol Chem* **282**, 35279-35292 (2007).
- 18 85. D. Patsouris *et al.*, Ablation of CD11c-positive cells normalizes insulin sensitivity in obese  
19 insulin resistant animals. *Cell Metab* **8**, 301-309 (2008).
- 20 86. J. Lin *et al.*, Increased generation of Foxp3(+) regulatory T cells by manipulating antigen  
21 presentation in the thymus. *Nat Commun* **7**, 10562 (2016).
- 22 87. F. Zhang *et al.*, Lacteal junction zippering protects against diet-induced obesity. *Science*  
23 **361**, 599-603 (2018).
- 24 88. G. Martinez-Santibanez, K. W. Cho, C. N. Lumeng, Imaging white adipose tissue with  
25 confocal microscopy. *Methods Enzymol* **537**, 17-30 (2014).
- 26

27

## 28 **Acknowledgments**

29 We thank Dr. Maria Lafaille and Dr. Gabriel Victora for valuable comments on the manuscript.  
30 We acknowledge NYULH DART Microscopy Lab for assistance with microscopy work.  
31 Microscopy shared resource is supported by the Cancer Center Support Grant, P30CA016087.  
32 We thank Alireza Khodadadi-Jamayran from NYU Langone Medical Center Applied  
33 Bioinformatics Laboratory for initial assembly of processed RNAseq data. We acknowledge  
34 NYULH DART Genome Technology Center for assistance with RNA sequencing. This a shared  
35 resource partially supported by the Laura and Isaac Perlmutter Cancer Center, Cancer Center  
36 Support Grant P30CA016087. J.Z. Kitoko and C.P. Queiroz were supported by fellowships from  
37 the Coordination for the Improvement of Higher Education Personnel (CAPES-Brazil). H.M.  
38 Silva was supported by a fellowship from the National Council for Scientific and Technological  
39 Development (CNPq – Brazil) and a postdoctoral fellowship from Dr. Bernard B. Levine.

40

## 41 **Author Contributions**

42 Conceptualization, H.M.S., D.M., M.T.B. and J.J.L.; Methodology, H.M.S., J.Z.K., C.P.Q., L.K.,  
43 F.M., K.L.Y and C.R.F.; Software, H.M.S.; Validation, H.M.S., J.Z.K., C.P.Q., L.K., F.M., K.L.Y  
44 and C.R.F.; Formal Analysis, H.M.S., J.Z.K., C.P.Q., L.K. and F.M.; Investigation, H.M.S., J.Z.K.,  
45 C.P.Q., L.K., F.M., K.L.Y and C.R.F.; Data Curation, H.M.S.; Writing – Original Draft, H.M.S and

1 J.J.L.; Writing – Review & Editing, H.M.S., J.Z.K., C.P.Q., L.K., F.M., K.L.Y., C.R.F., D.R.L.,  
2 M.T.B., D.M. and J.J.L.; Visualization, H.M.S., J.Z.K. and C.P.Q.; Supervision, H.M.S. and  
3 J.J.L.; Project Administration, H.M.S. and J.J.L; Funding Acquisition, J.J.L.

4

### 5 **Competing interests**

6 D.R.L. consults and has equity interest in Chemocentryx, Vedanta, and Pfizer Pharmaceuticals.  
7 All other authors declare no competing financial interests.

8

### 9 **Materials & Correspondence**

10 Hernandez Moura Silva (hernandez.mourasilva@med.nyu.edu) or Juan J. Lafaille  
11 (juan.lafaille@med.nyu.edu)

12

### 13 **Figure Legends**

14 **Fig. 1. The visceral fat in mouse and humans harbors a *Maf*-dependent subpopulation of**  
15 **perivascular macrophages.** (A) VAMs are closely associated with blood vessels in adult WT  
16 mice. eWAT full-mount sections stained with anti-CD206 (Green), anti-CD31 (Magenta), bodipy  
17 (yellow) and DAPI (blue). Scale Bars, 5  $\mu$ m. 63x magnification. (B) Human visceral adipose  
18 tissue displays perivascular macrophages with a similar phenotype as described in mice.  
19 Confocal image of human clarified visceral adipose tissue stained with anti-CD206 (Green), anti-  
20 CD31 (Magenta) and anti-LYVE1 (white). Scale Bars, 15  $\mu$ m. 63x magnification. Representative  
21 image. n=3. (C) *Maf* normalized RNAseq counts expressed by different subpopulations of  
22 myeloid cells in the eWAT as described previously(15). CD11b<sup>-</sup>DCs were gated as CD45<sup>+</sup>Lin<sup>-</sup>  
23 CD11b<sup>-</sup>CD64<sup>-</sup>CD11c<sup>+</sup>MHCII<sup>+</sup>. n=3. (D) Schematic Venn diagram depicting the rationale of using  
24 3 different cre drivers to ascertain the function of VAMs. (E) Impact of *Maf* ablation in VAMs  
25 macrophages in the eWAT. Each column represents VAMs from the animal depicted in the top.  
26 The gates in maroon color highlights the lost of cells with a typical VAM2 phenotype in the  
27 conditional knockout models used. Percentage of cells is shown. Representative dot plots of at  
28 least n=3. (F) Distribution of eWAT macrophages per gram of adipose tissue in the different  
29 conditional knockout models used in (E). Graph bar colors correspond to the models listed in (D,  
30 E). For each model, littermate controls were used as *Maf*<sup>F/F</sup> WT controls. (G) Volcano plot  
31 comparing the top  $\approx$ 8,000 genes expressed by VAM1 (MHCII<sup>+</sup>) from *Lyve1*<sup>Cre</sup>*Maf*<sup>F/F</sup> and  
32 littermates controls from eWAT. Yellow dots highlight signature genes whose expression was  
33 modified by *Maf* gene deletion. Consolidated data from 3 animals in each group. Grey dots are  
34 genes non-significantly modulated. Numbers in the top corner are the total of differentially  
35 expressed genes. VAMs from both mice were purified by sorting as CD45<sup>+</sup>CD11b<sup>+</sup>CD64<sup>+</sup>Ly6C<sup>-</sup>  
36 Ly6G<sup>-</sup>CD206<sup>HIGH</sup>MHCII<sup>+</sup> cells. (H) *Maf* ablation leads to a transcriptional landscape distinct from  
37 VAM1 and VAM2 in the eWAT. Heat map of signature genes from *Maf* deficient. Each column

1 represents one animal. The z-score of the gene expression profiles gives a scale to measure the  
2 differential expression. Each dot in the bar graphs represents one animal. Bar graphs display  
3 mean values. See also Fig. S1.

4

5 **Fig. 2. VAM2s are predominantly embryonically derived and show early dependence for**  
6 ***Maf* expression.** (A-C) VAM2s can not be repopulated by bone marrow derived macrophages in  
7 bone marrow chimeras. (A) CD45.2 congenic WT mice were lethally irradiated and adoptively  
8 transferred bone marrow (BM) cells from a CD45.1 congenic donor. After 60 days of the BM  
9 transfer the eWAT was harvested and analyzed. (B) Distribution of host (CD45.2) and donor  
10 cells (CD45.1) among monocytes (gated as CD45<sup>+</sup>Lin<sup>-</sup>CD11b<sup>+</sup>CX3CR1<sup>+</sup>MHCII<sup>-</sup>Ly6C<sup>HIGH</sup>) and  
11 VAMs (gated as CD45<sup>+</sup>Lin<sup>-</sup>CD11b<sup>+</sup>CD64<sup>+</sup>CD206<sup>HIGH</sup>). Representative dot plot. n=4. Percentage  
12 of cells is shown. (C) Phenotype of host *versus* donor VAMs depicted in (B). Percentage of cells  
13 is shown. (D) Yolk sac fate mapping of EMPs. Pregnant *CX3CR1*<sup>CRE-ERT2xR26-LSL-DsRed</sup> mice were  
14 treated with tamoxifen on day 9.5 of pregnancy to label EMPs with DsRed color. 90 days post  
15 birth the offspring was analyzed. (E) Distribution of VAMs from the animals depicted in (D).  
16 DsRed<sup>+</sup> cells have an EMP origin. Representative dot plot. n=4. Percentage of cells is shown.  
17 (F), Analysis of VAMs from *CCR2*<sup>KO</sup> mice. Representative dot plot of VAMs from *CCR2*<sup>KO</sup> mice  
18 and littermate controls. Gate in pink highlight cell populations impacted by *CCR2* deficiency.  
19 Percentage of cells is shown. (G), Absolute cell numbers of cells shown in (F). (H-I) Confocal  
20 microscopy of eWAT from P5 WT mice stained with anti-CD206 (Green), anti-CD31 (Magenta),  
21 anti-LYVE1 (Cyan) and Bodipy (Yellow). Scale Bars, 20 μm. 20x magnification. Images  
22 representative of at least n = 3. (I) High magnification of the quadrant depicted in (H). Scale  
23 Bars, 10 μm. 63x magnification. (J) eWAT MHCII<sup>+</sup>TIM4<sup>+</sup> VAMs appear early on in the  
24 development of the eWAT in animals *Csf1r*<sup>Cre</sup>*Maf*<sup>F/F</sup>. Newborns were sacrificed in the ages  
25 depicted above each column and the rudimentary eWAT analyzed by flow cytometry. Purple  
26 arrowhead indicated the early appearance of VAM2 in WT mice at P10-P12. Green arrowhead  
27 shows VAM1 emergence at P14. Magenta arrows show the emergence of MHCII<sup>+</sup>TIM4<sup>+</sup> VAMs  
28 by P10-P12 in *Csf1r*<sup>Cre</sup>*Maf*<sup>F/F</sup> mice. Representative images. n=3. See also Fig. S2.

29  
30 **Fig. 3. The transcription factor c-MAF is fundamental for the phenotype of VAM like**  
31 **perivascular macrophages in the brain and gut.** (A) CD206<sup>HIGH</sup> macrophages are also tightly  
32 associated with blood vessels in the brain and gut of adult WT mice. Lightsheet microscopy of a  
33 full mouse brain frontal cortex after clarification and stained with anti-CD206 (Green) and anti-  
34 CD31 (White). Scale Bars, 100 μm. 4x magnification. (B) Clarified brain stained with anti-CD206  
35 (Green), anti-CD31 (Magenta) and anti-IBA1 (White). Scale Bars, 10 μm. 63x magnification. (C)  
36 Colon *muscularis* stained with anti-CD206 (Green), anti-CD31 (Magenta) and anti-MHCII  
37 (White). Scale Bars, 20 μm. 20x magnification. Images representative of at least n = 3. (D)



1 Impact of *Maf* ablation in brain and gut CD206<sup>HIGH</sup> macrophages. Each column represents  
2 macrophages populations of the animal depicted in the top. Each row represents cells from the  
3 organ shown in the left. The gates in maroon color highlights the lost of cells with a typical  
4 CD206<sup>HIGH</sup> perivascular phenotype in the conditional knockout models used. Percentage of cells  
5 is shown. Representative dot plots of at least n=3. (E) Total brain cell numbers in the different  
6 conditional knockout models used in (D). (F) Total colon cell numbers in the different conditional  
7 knockout models used in (D). Graph bar colors correspond to the models listed in (D). For each  
8 model, littermate controls were used as *Maf*<sup>F/F</sup> WT controls. (G) Confocal image of a clarified  
9 brain of *Lyve1*<sup>Cre</sup>*Maf*<sup>F/F</sup> and littermate control mice demonstrating the ablation of BAMs  
10 CD206<sup>HIGH</sup>. Brains were stained with anti-CD206 (Green), anti-CD31 (white). Scale Bars, 50 µm.  
11 10x magnification. Representative images. n=3. Each dot in the bar graphs represents one  
12 animal. Bar graphs display mean values. See also Fig. S3 and S4.

13  
14 **Fig. 4. *Maf* ablation in perivascular macrophages leads to increased vascular density in**  
15 **the eWAT.** (A) Confocal images of clarified eWAT from animals *Lyve1*<sup>Cre</sup>*Maf*<sup>F/F</sup>, *LySM*<sup>Cre</sup>*Maf*<sup>F/F</sup>,  
16 *Csf1r*<sup>Cre</sup>*Maf*<sup>F/F</sup> and littermate control stained with anti-CD31 (Magenta). Scale Bars, 20 µm. 20x  
17 magnification. Representative images. n≥3. (B) Quantification of the vascular surface area  
18 assessed by the anti-CD31 staining observed in (A) Three to four 50µm deep images were  
19 taken per animal and the vascular surface area reconstructed using the IMARIS software. Each  
20 dot represents the quantification for each picture. n≥3. Representative of 3 independent  
21 experiments. (C) Quantification of the vascular surface area assessed by the anti-CD31 staining  
22 of young 5 weeks old *Csf1r*<sup>Cre</sup>*Maf*<sup>F/F</sup> mice. Three to four 50µm deep images were taken per  
23 animal and the vascular surface area reconstructed using the IMARIS software. Each dot  
24 represents the quantification for each picture. n=3. (D) Evaluation of the endocytic capacity of  
25 eWAT VAMs in the different animal models used in (A) Ovalbumin-A647 (Ova-A647) was  
26 injected i.v. and after the depicted time the uptake of ovalbumin was measured by flow  
27 cytometry in the eWAT. Representative histograms; n = 3. The dashed line represents the  
28 median fluorescence intensity of the WT VAMs. (E) Distribution of eWAT macrophages per gram  
29 of adipose tissue in *Lyve1*<sup>Cre</sup>*Csf1r*<sup>F/F</sup> mice. Littermate controls were used as *Csf1r*<sup>F/F</sup> WT  
30 controls. Each dot in the bar graphs represents one animal. Representative of 3 independent  
31 experiments. (F) *Lyve1*<sup>Cre</sup>*Csf1r*<sup>F/F</sup> mice display increased vascular density in the eWAT.  
32 Confocal images of clarified eWAT stained with anti-CD31 (Magenta). Scale Bars, 20 µm. 20x  
33 magnification. Representative images. n≥3. (G) Quantification of the vascular surface area  
34 assessed by the anti-CD31 staining observed in (F). Three to four 50µm deep images were  
35 taken per animal and the vascular surface area reconstructed using the IMARIS software. Each  
36 dot represents the quantification for each picture. n≥3. Representative of 2 independent  
37 experiments. Bar graphs display mean values. See also Fig. S5.

1  
2 **Fig. 5. *Maf* ablation in macrophages protects animals from the early onset of metabolic**  
3 **syndrome.** (A) Experimental design for (B-H). (B) Glucose tolerance test (GTT) of *Csf1r<sup>Cre</sup>Maf*  
4 *<sup>F/F</sup>* mice and littermate controls under normal or high fat diet (ND or HFD).  $n > 3$ . Representative  
5 of 3 independent experiments. (C) Area under the curve of the GTT displayed in (B) (Arbitrary  
6 units). Bar graphs display mean  $\pm$  SEM. (D, E) Animal weight and eWAT fat pads weight of  
7 animals depicted in (B). (F) Evaluation of eWAT VAMs endocytic capacity in animals submitted  
8 to HFD. Ovalbumin-A647 (Ova-A647) was injected i.v. and after the depicted time the uptake of  
9 ovalbumin was measured by flow cytometry in the eWAT. Representative histograms;  $n \geq 4$ . The  
10 dashed line represents the median fluorescence intensity of macrophages from animals under  
11 ND regimen. (G) Fold increase of the median ovalbumin-A647 fluorescence intensity after  
12 injection as depicted in (F) normalized to the individual autofluorescence of each subpopulation,  
13  $n \geq 4$ . Each dot in the bar graphs represents one animal. Bar graphs display mean values. (H)  
14 Distribution of VAMs and DPs ( $CD11c^+CD64^+$ ) macrophages per gram of eWAT in the animals  
15 depicted in (B). Each dot in the bar graphs represents one animal. Bar graphs display mean  
16 values. DPs: Double positive macrophages were gated as  $CD45^+Lin^-$   
17  $CD11b^+CD206^{LOW/INT}MHCII^+CD64^+CD11c^+$ . See also Fig. S6.

18  
19

## 20 SUPPLEMENTARY MATERIALS

21 Fig. S1 (Related to Main Fig. 1). Distribution of perivascular macrophages expressing  
22  $CD38^+Folr2^+CD206^{HIGH}$  in the eWAT.

23 Fig. S2 (Related to Main Fig. 2). Adult VAM2s do not develop from bone marrow progenitors.

24 Fig. S3 (Related to Main Fig. 3). Brain BAMs  $CD206^{HIGH}$  share key similarities and *Maf*-  
25 dependence with eWAT VAM2.

26 Fig. S4 (Related to Main Fig. 3).  $CD206^{HIGH}$  macrophages from the large intestine display a  
27 phenotype that resembles eWAT VAMs.

28 Fig. S5 (Related to Main Fig. 4). eWAT adipocyte size distribution is mostly preserved in young  
29 *Csf1r<sup>Cre</sup>Maf<sup>F/F</sup>* mice.

30 Fig. S6 (Related to Main Fig. 5). Animals *Csf1r<sup>Cre</sup>Maf<sup>F/F</sup>* display improved metabolic parameters  
31 under HFD.

32  
33

## 34 SUPPLEMENTARY FIGURE LEGENDS

35

36 **Fig. S1. Distribution of perivascular macrophages expressing  $CD38^+Folr2^+CD206^{HIGH}$  in**  
37 **the eWAT.** (A) Flow cytometry analysis of cell surface markers expressed by VAMs in adult WT

1 C57BL/6 mice. eWAT VAMs were gated as  $CD45^+Lin^-CD11b^+CD64^+CD206^{HIGH}$ . The magenta  
2 and blue gates correspond to VAM2 and VAM1, respectively. (B) Flow cytometry analysis of  
3 human visceral fat macrophages. Percentage of cells is shown. Representative dot plot. n=3. (C)  
4 VAMs are highly endocytic *in vivo*. Ovalbumin-A647 (Ova-A647) was injected i.v. and after the  
5 depicted time the uptake of Ovalbumin was measured by flow cytometry. VAMs gated as  
6 mentioned in (A). Representative histograms; n = 3. Dashed lines represent the median  
7 fluorescence intensity of the VAM2. Bar graphs show the fold increase of the median ovalbumin-  
8 A647 fluorescence intensity after injection normalized to the individual autofluorescence of each  
9 subpopulation, n = 3.  $CD11b^+$ DCs gated as  $CD45^+Lin^-CD11b^+CD64^-CD11c^+MHCII^+$ . Bar graphs  
10 display mean $\pm$ SEM. (D) *Lyve1<sup>Cre</sup>Maf<sup>F/F</sup>* mice do not show abnormality in liquid drainage from  
11 extremities. Foot pad were not swollen in these animals. Representative figure n=5. (E)  
12 *Lyve1<sup>Cre</sup>Maf<sup>F/F</sup>* mice display functional lymphatic vessels. Evans blue dye (40mg/ml) was  
13 injected in one hind foot pad of *Lyve1<sup>Cre</sup>Maf<sup>F/F</sup>* or littermate controls and the dye drainage  
14 through lymphatic vessels around the small saphenous vein was visualized 30 min post  
15 injection. Blue arrowheads are indicating evans blue loaded lymphatic vessels. Representative  
16 figure. n=3 for each group. (F) Evans blue dye is efficiently drained into the Popliteal lymph node  
17 of *Lyve1<sup>Cre</sup>Maf<sup>F/F</sup>*. Lymph nodes of the experiment depicted in (E) are shown. pLN = Popliteal  
18 lymph node. Scale Bars, 500  $\mu$ m. Representative figure. n=3 for each group. (G) *Lyve1<sup>Cre</sup>Maf<sup>F/F</sup>*  
19 mice display a preserved capacity to form a lymphatic vessel tree within the eWAT. Whole  
20 eWAT fat pad were clarified, stained with LYVE1 (Orange) and imaged using a light sheet  
21 microscope. Scale Bars, 300  $\mu$ m. 4x magnification. (H) Lymphatic vessels of *Lyve1<sup>Cre</sup>Maf<sup>F/F</sup>*  
22 display a similar structure to those observed in littermate controls. Clarified eWAT were stained  
23 with LYVE1 (Orange) and imaged using a confocal microscope. Scale Bars, 20  $\mu$ m. 20x  
24 magnification. Representative images. (I) Distribution of myeloid cells per gram of eWAT in the  
25 different conditional knockout models used in main Fig. 1E. Graph bar colors correspond to the  
26 models listed in main Fig. 1E. For each model, littermate controls were used as *Maf<sup>F/F</sup>* WT  
27 controls. Ly6C<sup>LOW</sup> Mon: Ly6C<sup>LOW</sup> Monocytes were gated as  $CD45^+Lin^-CD11b^+CX3CR1^+MHCII^-$   
28 Ly6C<sup>LOW</sup>. Neutrophils were gated as  $CD45^+CD11b^+MHCII^-Ly6G^+$ . Eosinophils were gated as  
29  $CD45^+CD11b^+MHCII^-SSC^{HIGH}SiglecF^+$ . PreVAMs were gated as  $CD45^+Lin^-$   
30  $CD11b^+CD206^{LOW/INT}MHCII^+CD64^+CD11c^-$ . DPs: Double positive macrophages were gated as  
31  $CD45^+Lin^-CD11b^+CD206^{LOW/INT}MHCII^+CD64^+CD11c^+$ .  $CD11b^-$ DCs were gated as  $CD45^+Lin^-$   
32  $CD11b^-CD64^-CD11c^+MHCII^+$ . Ptn: Protein. Lin:  $CD90^+CD19^+Ly6G^+SiglecF^+$ .

33  
34 **Fig. S2. Adult VAM2s do not develop from bone marrow progenitors.** (A) Experimental  
35 design for (B). (B) Phenotype of organ resident VAMs (Neonate) *versus* BM derived VAMs  
36 (Adult VAMs) originated from the transplant recipient that migrated to the transplanted eWAT  
37 under the kidney capsule as explained in (A) VAMs (gated as  $CD45^+Lin^-$

1 CD11b<sup>+</sup>CD64<sup>+</sup>CD206<sup>HIGH</sup>). Representative dot plot. n=4. Percentage of cells is shown.

2

3 **Fig. S3. Brain BAMs CD206<sup>HIGH</sup> share key similarities and *Maf*-dependence with eWAT**  
4 **VAM2.** (A) Flow cytometry gate strategy used to analyze brain perivascular macrophages.  
5 Percentage of cells is shown. (B) Flow cytometry analysis of cell surface markers expressed by  
6 BAMs. Histograms represent the pink and blue gates depicted in the BAMs dot plot in (A).  
7 Representative histograms of at least n=5. Dashed lines represent the median fluorescence  
8 intensity of microglia as a comparative measure in the organ. (C) BAMs CD206<sup>HIGH</sup> express  
9 lower levels of CD45 in relation to bone marrow derived monocytes. n≥5. Monocytes were gated  
10 as CD45<sup>+</sup>Lin<sup>-</sup>CD11b<sup>+</sup>CX3CR1<sup>+</sup>MHCII<sup>-</sup>Ly6C<sup>HIGH</sup>. (D) BAMs CD206<sup>HIGH</sup> are highly endocytic *in*  
11 *vivo*. Ovalbumin-A647 (Ova-A647) was injected i.v. and after the depicted time the uptake of  
12 Ovalbumin was measured by flow cytometry. BAMs gated as mentioned in (A). Representative  
13 histograms; n = 3. Dashed lines represent the median fluorescence intensity of the BAMs  
14 CD206<sup>HIGH</sup>. Bar graphs show the fold increase of the median ovalbumin-A647 fluorescence  
15 intensity after injection normalized to the individual autofluorescence of each subpopulation, n =  
16 3. Bar graphs display mean±SEM. (E) Neonate Brains (P5) show early ablation of BAMs  
17 CD206<sup>HIGH</sup>. Total Brain cell numbers in *Csf1r<sup>Cre</sup>Maf<sup>F/F</sup>*. Littermate controls were used as *Maf<sup>F/F</sup>*  
18 WT controls. n=3. Representative of 2 independent experiments. (F) Distribution of myeloid cells  
19 per brain in the different conditional knockout models used in main Fig. 3 D, E. For each model,  
20 littermate controls were used as *Maf<sup>F/F</sup>* WT controls. (G) Confocal image of clarified brains of  
21 *Lyve1<sup>Cre</sup>Maf<sup>F/F</sup>* and littermate control mice demonstrating the ablation of BAMs CD206<sup>HIGH</sup>.  
22 Brains were stained with anti-CD206 (Green), anti-LYVE1 (Cyan) and the background (White).  
23 Scale Bars, 20 μm. 20x magnification. Representative images. n=3. Ly6C<sup>LOW</sup> Mon: Ly6C<sup>LOW</sup>  
24 Monocytes were gated as CD45<sup>+</sup>Lin<sup>-</sup>CD11b<sup>+</sup>CX3CR1<sup>+</sup>MHCII<sup>-</sup>Ly6C<sup>LOW</sup>. Neutrophils were gated  
25 as CD45<sup>+</sup>CD11b<sup>+</sup>MHCII<sup>-</sup>Ly6G<sup>+</sup>. CD11b<sup>-</sup>DCs were gated as CD45<sup>+</sup>Lin<sup>-</sup>CD11b<sup>-</sup>CD64<sup>-</sup>  
26 CD11c<sup>+</sup>MHCII<sup>+</sup>. CD11b<sup>+</sup>DCs were gated as CD45<sup>+</sup>Lin<sup>-</sup>CD11b<sup>+</sup>CD64<sup>-</sup>CD11c<sup>+</sup>MHCII<sup>+</sup>. Ptn:  
27 Protein. Lin: CD90<sup>+</sup>CD19<sup>+</sup>Ly6G<sup>+</sup>SiglecF<sup>+</sup>.

28

29 **Fig. S4. CD206<sup>HIGH</sup> macrophages from the large intestine display a phenotype that**  
30 **resembles eWAT VAMs.** (A) Flow cytometry gate strategy used to analyze large intestine (Li)  
31 macrophages of mice used in this study. Percentage of cells is shown. (B) Flow cytometry  
32 analysis of cell surface markers expressed by VAMs from Li. Histograms represent the magenta,  
33 blue and green gates depicted in the Li macrophages in (A). CD38<sup>-</sup> Mac: CD38<sup>-</sup> macrophages  
34 were gate as CD45<sup>+</sup>CD11b<sup>+</sup>CD64<sup>+</sup>CD38<sup>-</sup>MHCII<sup>+</sup>. Mon: Monocytes were gated as CD45<sup>+</sup>Lin<sup>-</sup>  
35 CD11b<sup>+</sup>CX3CR1<sup>+</sup>MHCII<sup>-</sup>Ly6C<sup>HIGH</sup>. Representative histograms of at least n=5. Dashed lines  
36 represent the median fluorescence intensity of monocytes as a comparative measure in the  
37 organ. (C) VAMs Li are also localized in close proximity to enteric-associated neurons in the

1 large intestine myenteric plexus of adult WT mice. Colon stained with anti-CD206 (Green), anti-  
2 ANNA-1 (Magenta - neuron body) and anti-MHCII (White). Scale Bars, 20  $\mu$ m. 20x  
3 magnification. n = 3. (D) Same as in c in higher details. Figure depicts the white box shown in  
4 (C) showing in details the close proximity of perivascular macrophages to enteric-associated  
5 neurons. Scale Bars, 10  $\mu$ m. 20x magnification. (E) The small intestine *muscularis* layer also  
6 display VAM related macrophages (pink) and non-related (green) perivascular macrophages.  
7 Cells were gated as depicted in (A). Percentage of cells is shown. n=3. (F) VAMs Li are highly  
8 endocytic *in vivo*. Ovalbumin-A647 (Ova-A647) was injected i.v. and after the depicted time the  
9 uptake of Ovalbumin was measured by flow cytometry. VAMs Li gated as mentioned in (A).  
10 Representative histograms; n = 3. Dashed lines represent the median fluorescence intensity of  
11 the VAM2 Li. Bar graphs show the fold increase of the median ovalbumin-A647 fluorescence  
12 intensity after injection normalized to the individual autofluorescence of each subpopulation, n =  
13 3. CD11b<sup>+</sup>DCs gated as CD45<sup>+</sup>Lin<sup>-</sup>CD11b<sup>+</sup>CD64<sup>-</sup>CD11c<sup>+</sup>MHCII<sup>+</sup>. Bar graphs display  
14 mean $\pm$ SEM. (G) Distribution of myeloid cells per colon in the different conditional knockout  
15 models used in main fig. 3D and fig. 3F. For each model, littermate controls were used as *Maf*<sup>F/F</sup>  
16 WT controls. (H) Representative dot plot demonstrating the impact of *Maf* deletion in the small  
17 intestine *muscularis* layer of animals *Csf1r*<sup>Cre</sup>*Maf*<sup>F/F</sup>. Each dot in the bar graphs represents one  
18 animal. Bar graphs display mean values. Ly6C<sup>LOW</sup> Mon: Ly6C<sup>LOW</sup> Monocytes were gated as  
19 CD45<sup>+</sup>Lin<sup>-</sup>CD11b<sup>+</sup>CX3CR1<sup>+</sup>MHCII<sup>-</sup>Ly6C<sup>LOW</sup>. Neutrophils were gated as CD45<sup>+</sup>CD11b<sup>+</sup>MHCII<sup>-</sup>  
20 Ly6G<sup>+</sup>. Eosinophils were gated as CD45<sup>+</sup>CD11b<sup>+</sup>MHCII<sup>-</sup>SSC<sup>HIGH</sup>SiglecF<sup>+</sup>. CD11b<sup>-</sup>DCs were  
21 gated as CD45<sup>+</sup>Lin<sup>-</sup>CD11b<sup>-</sup>CD64<sup>-</sup>CD11c<sup>+</sup>MHCII<sup>+</sup>. CD11b<sup>+</sup>DCs were gated as CD45<sup>+</sup>Lin<sup>-</sup>  
22 CD11b<sup>+</sup>CD64<sup>-</sup>CD11c<sup>+</sup>MHCII<sup>+</sup>. Mac: Macrophage. Ptn: Protein. Lin: CD90<sup>+</sup>CD19<sup>+</sup>Ly6G<sup>+</sup>SiglecF<sup>+</sup>.

23  
24 **Fig. S5. eWAT adipocyte size distribution is mostly preserved in young *Csf1r*<sup>Cre</sup>*Maf*<sup>F/F</sup>**  
25 **mice.** (A) eWAT h&e staining/sectioning of the animals depicted in the main fig. 4C. Scale Bars,  
26 20  $\mu$ m. 20x magnification. Representative images. n=3. (B) Distribution of adipocytes sizes over  
27 the total number of adipocytes evaluated from animals depicted in (A). For each animal at least  
28 6 randomly acquired h&e sections were analyzed. An average of 380 adipocytes were evaluated  
29 per animal using ImageJ software. Area under the curve was evaluated using the graph prism  
30 v.8 software.

31  
32 **Fig. S6. Animals *Csf1r*<sup>Cre</sup>*Maf*<sup>F/F</sup> display improved metabolic parameters under HFD.** (A)  
33 Experimental design for (B and F). (B) Triglycerides levels obtained from animals depicted in  
34 main fig. 5 B. n $\geq$ 3. (C) Pyruvate tolerance test to evaluate liver gluconeogenesis. ND-fed  
35 *Csf1r*<sup>Cre</sup>*Maf*<sup>F/F</sup> mice and littermate controls were fasted for 16 hours. Sodium pyruvate (1g/kg)  
36 was then injected intraperitoneally and glucose blood levels were evaluated in the depicted  
37 times. n = 8 to 10 per group. (D) Experimental design for (E). (E) Serum triglyceride content in

1 ND-fed *Csf1r<sup>Cre</sup>Maf<sup>F/F</sup>* mice and littermate controls after gavage with 200  $\mu$ l of olive oil. Mice  
2 were fasted for 6 hours before gavage. Triton WR1339 (0.5 g/kg) was injected intraperitoneally  
3 30 min before gavage. n=8, per group. (F) Distribution of myeloid cells per gram of eWAT in  
4 *Csf1r<sup>Cre</sup>Maf<sup>F/F</sup>* mice submitted to HFD used in main fig. 5 B. eMon: eWAT Ly6C<sup>HIGH</sup> Monocytes.  
5 Ly6C<sup>LOW</sup> Mon: Ly6C<sup>LOW</sup> Monocytes. Neu: Neutrophils. Eos: Eosinophils. DCs: Dendritic cells.  
6 n $\geq$ 3. Representative of 3 independent experiments. Each dot in the bar graphs represents one  
7 animal. Bar graphs display mean values.



FIGURE 1

A

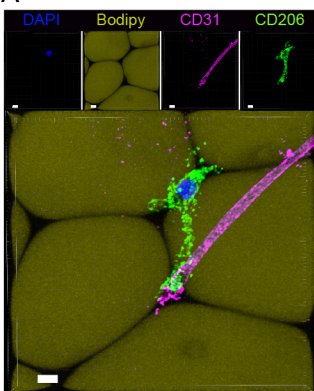

B

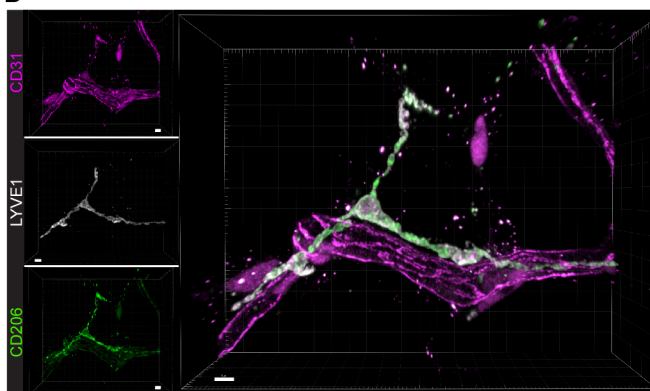

C

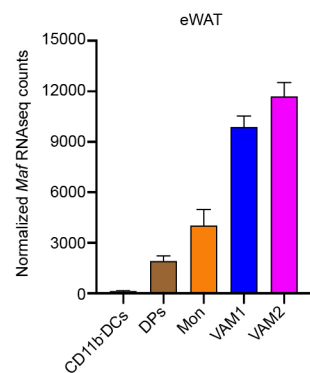

D

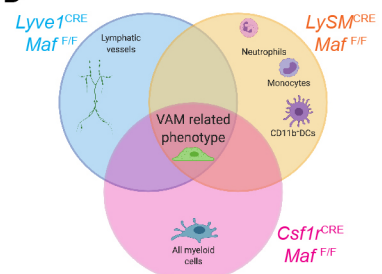

E

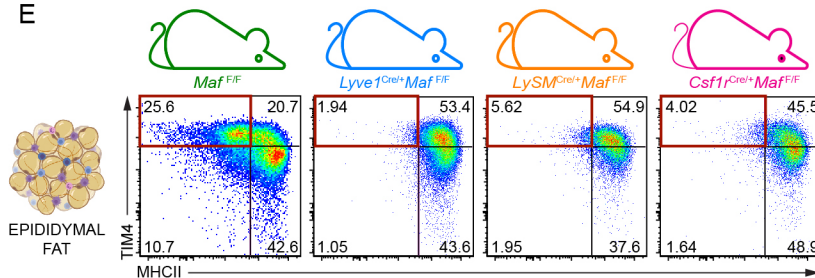

F

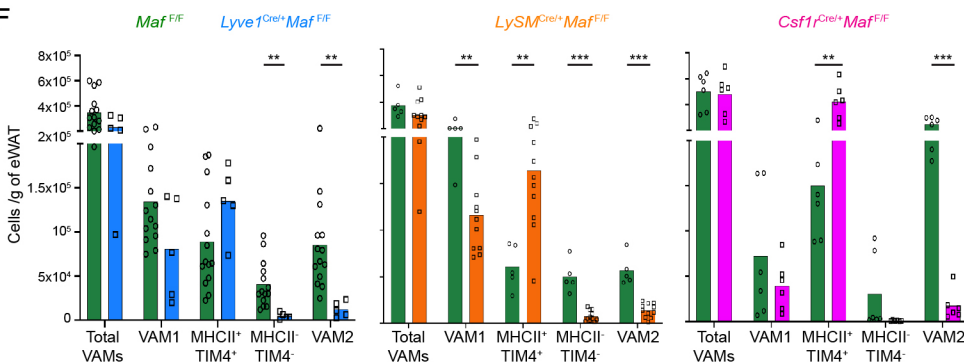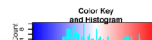

G

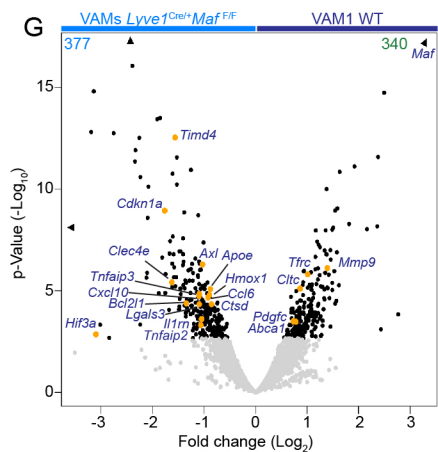

H

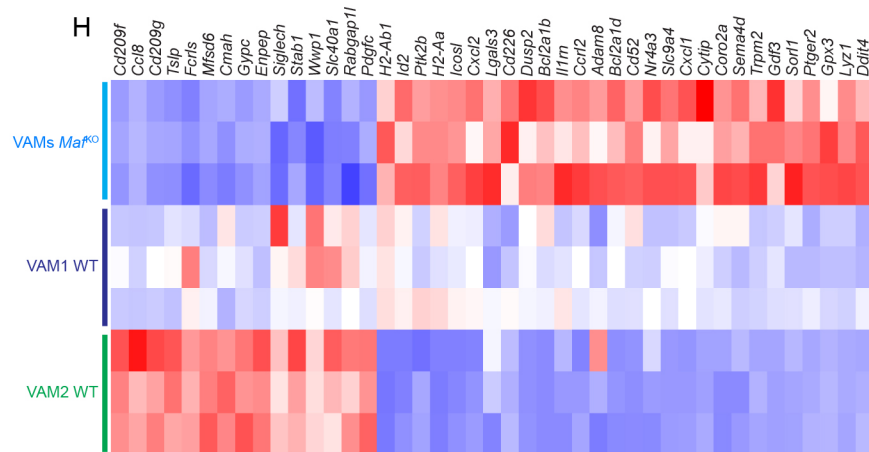



**Fig. 1. The visceral fat in mouse and humans harbors a *Maf*-dependent subpopulation**

of perivascular macrophages. (A) VAMs are closely associated with blood vessels in adult

WT mice. eWAT full-mount sections stained with anti-CD206 (Green), anti-CD31 (Magenta), bodipy (yellow) and DAPI (blue). Scale Bars, 5  $\mu$ m. 63x magnification. (B) Human visceral adipose tissue displays perivascular macrophages with a similar phenotype as described in mice. Confocal image of human clarified visceral adipose tissue stained with anti-CD206 (Green), anti-CD31 (Magenta) and anti-LYVE1 (white). Scale Bars, 15  $\mu$ m. 63x magnification. Representative image. n=3. (C) *Maf* normalized RNAseq counts expressed by different subpopulations of myeloid cells in the eWAT as described previously(15). CD11b<sup>-</sup> DCs were gated as CD45<sup>+</sup>Lin<sup>-</sup>CD11b<sup>-</sup>CD64<sup>-</sup>CD11c<sup>+</sup>MHCII<sup>+</sup>. n=3. (D) Schematic Venn diagram depicting the rationale of using 3 different cre drivers to ascertain the function of VAMs. (E) Impact of *Maf* ablation in VAMs macrophages in the eWAT. Each column represents VAMs from the animal depicted in the top. The gates in maroon color highlights the lost of cells with a typical VAM2 phenotype in the conditional knockout models used. Percentage of cells is shown. Representative dot plots of at least n=3. (F) Distribution of eWAT macrophages per gram of adipose tissue in the different conditional knockout models used in (E). Graph bar colors correspond to the models listed in (D, E). For each model, littermate controls were used as *Maf*<sup>F/F</sup> WT controls. (G) Volcano plot comparing the top  $\approx$  8,000 genes expressed by VAM1 (MHCII<sup>+</sup>) from *Lyve1*<sup>Cre</sup>*Maf*<sup>F/F</sup> and littermates controls from eWAT. Yellow dots highlight signature genes whose expression was modified by *Maf* gene deletion. Consolidated data from 3 animals in each group. Grey dots are genes non-significantly modulated. Numbers in the top corner are the total of differentially expressed genes. VAMs from both mice were purified by sorting as CD45<sup>+</sup>CD11b<sup>+</sup>CD64<sup>+</sup>Ly6C<sup>-</sup>Ly6G<sup>-</sup>CD206<sup>HIGH</sup>MHCII<sup>+</sup> cells. (H) *Maf* ablation leads to a transcriptional landscape distinct from VAM1 and VAM2 in the eWAT. Heat map of signature genes from *Maf* deficient. Each column represents one animal. The z-score of the gene expression profiles gives a scale to measure the differential expression. Each dot in the bar graphs represents one animal. Bar graphs display mean values. See also Fig. S1.

FIGURE 2

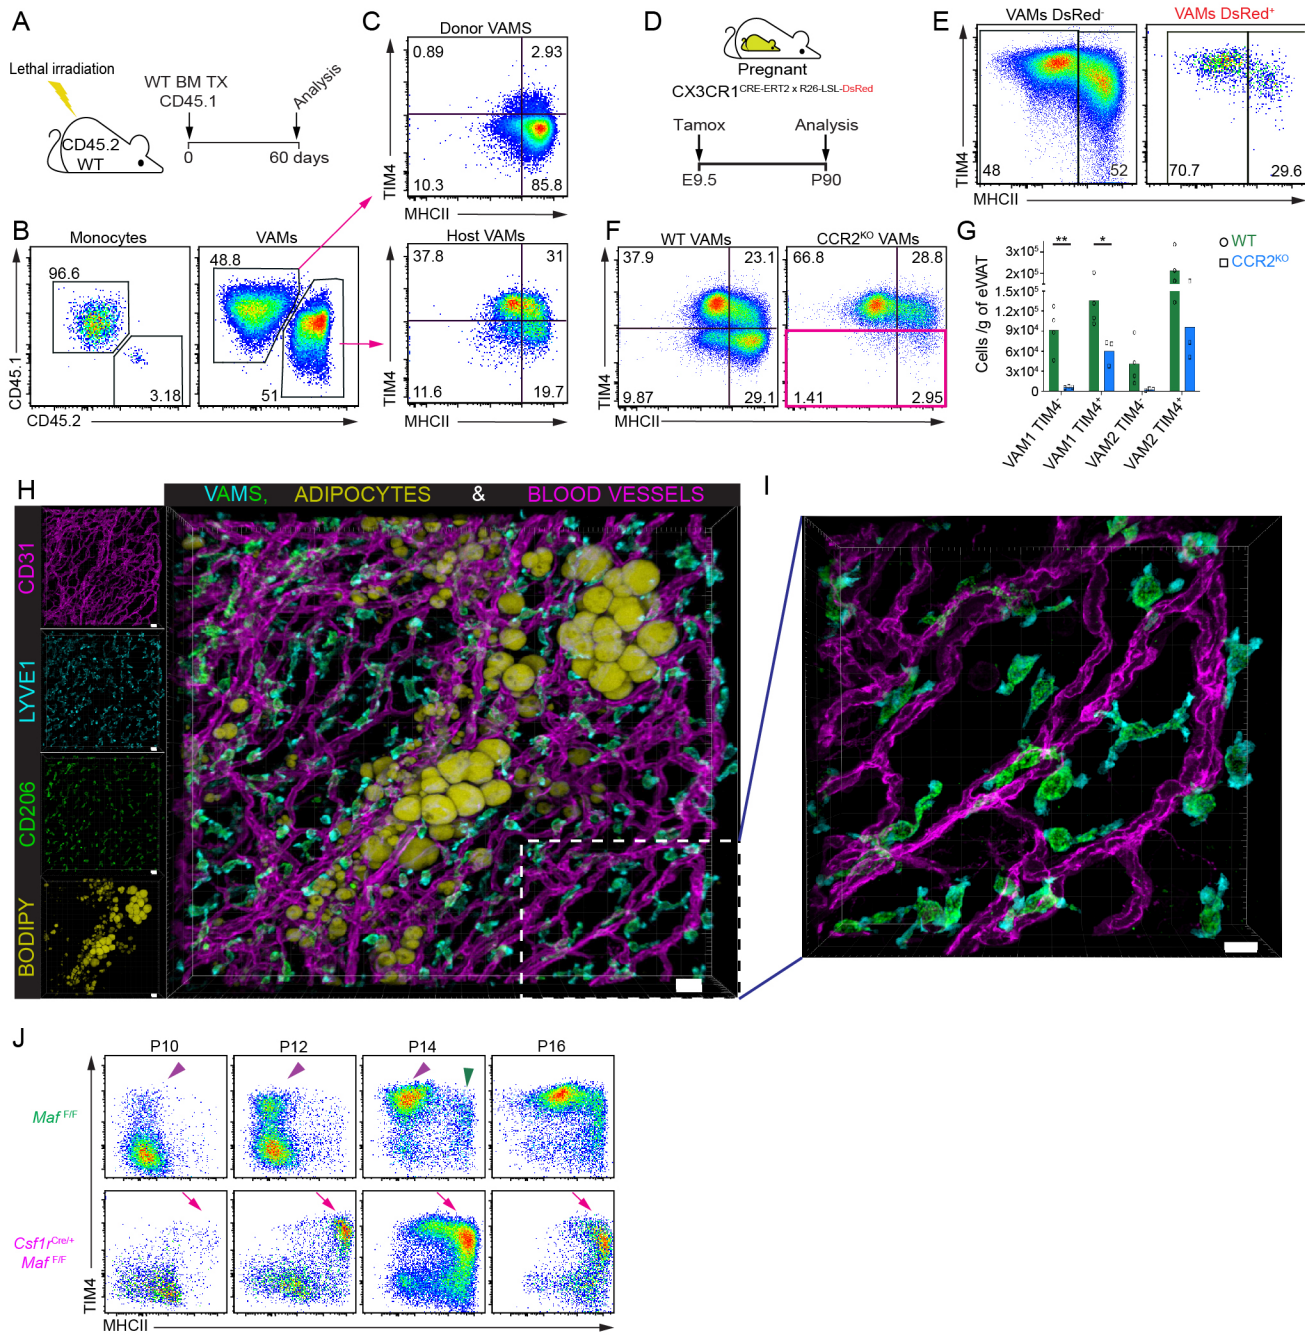

## Fig. 2. VAM2s are predominantly embryonically derived and show early dependence

bioRxiv preprint doi: <https://doi.org/10.1101/2021.02.07.430147>; this version posted February 8, 2021. The copyright holder for this preprint (which was not certified by peer review) is the author/funder. All rights reserved. No reuse allowed without permission.

**for *Maf* expression. (A-C) VAM2s can not be repopulated by bone marrow derived**  
macrophages in bone marrow chimeras. (A) CD45.2 congenic WT mice were lethally irradiated and adoptively transferred bone marrow (BM) cells from a CD45.1 congenic donor. After 60 days of the BM transfer the eWAT was harvested and analyzed. (B) Distribution of host (CD45.2) and donor cells (CD45.1) among monocytes (gated as CD45<sup>+</sup>Lin<sup>-</sup>CD11b<sup>+</sup>CX3CR1<sup>+</sup>MHCII<sup>-</sup>Ly6C<sup>HIGH</sup>) and VAMs (gated as CD45<sup>+</sup>Lin<sup>-</sup>CD11b<sup>+</sup>CD64<sup>+</sup>CD206<sup>HIGH</sup>). Representative dot plot. n=4. Percentage of cells is shown. (C) Phenotype of host *versus* donor VAMs depicted in (B). Percentage of cells is shown. (D) Yolk sac fate mapping of EMPs. Pregnant *CX3CR1*<sup>CRE-ERT2xR26-LSL-DsRed</sup> mice were treated with tamoxifen on day 9.5 of pregnancy to label EMPs with DsRed color. 90 days post birth the offspring was analyzed. (E) Distribution of VAMs from the animals depicted in (D). DsRed<sup>+</sup> cells have an EMP origin. Representative dot plot. n=4. Percentage of cells is shown. (F), Analysis of VAMs from *CCR2*<sup>KO</sup> mice. Representative dot plot of VAMs from *CCR2*<sup>KO</sup> mice and littermate controls. Gate in pink highlight cell populations impacted by *CCR2* deficiency. Percentage of cells is shown. (G), Absolute cell numbers of cells shown in (F). (H-I) Confocal microscopy of eWAT from P5 WT mice stained with anti-CD206 (Green), anti-CD31 (Magenta), anti-LYVE1 (Cyan) and Bodipy (Yellow). Scale Bars, 20  $\mu$ m. 20x magnification. Images representative of at least n = 3. (I) High magnification of the quadrant depicted in (H). Scale Bars, 10  $\mu$ m. 63x magnification. (J) eWAT MHCII<sup>+</sup>TIM4<sup>+</sup> VAMs appear early on in the development of the eWAT in animals *Csf1r*<sup>Cre</sup>*Maf*<sup>F/F</sup>. Newborns were sacrificed in the ages depicted above each column and the rudimentary eWAT analyzed by flow cytometry. Purple arrowhead indicated the early appearance of VAM2 in WT mice at P10-P12. Green arrowhead shows VAM1 emergence at P14. Magenta arrows show the emergence of MHCII<sup>+</sup>TIM4<sup>+</sup> VAMs by P10-P12 in *Csf1r*<sup>Cre</sup>*Maf*<sup>F/F</sup> mice. Representative images. n=3. See also Fig. S2.



FIGURE 3

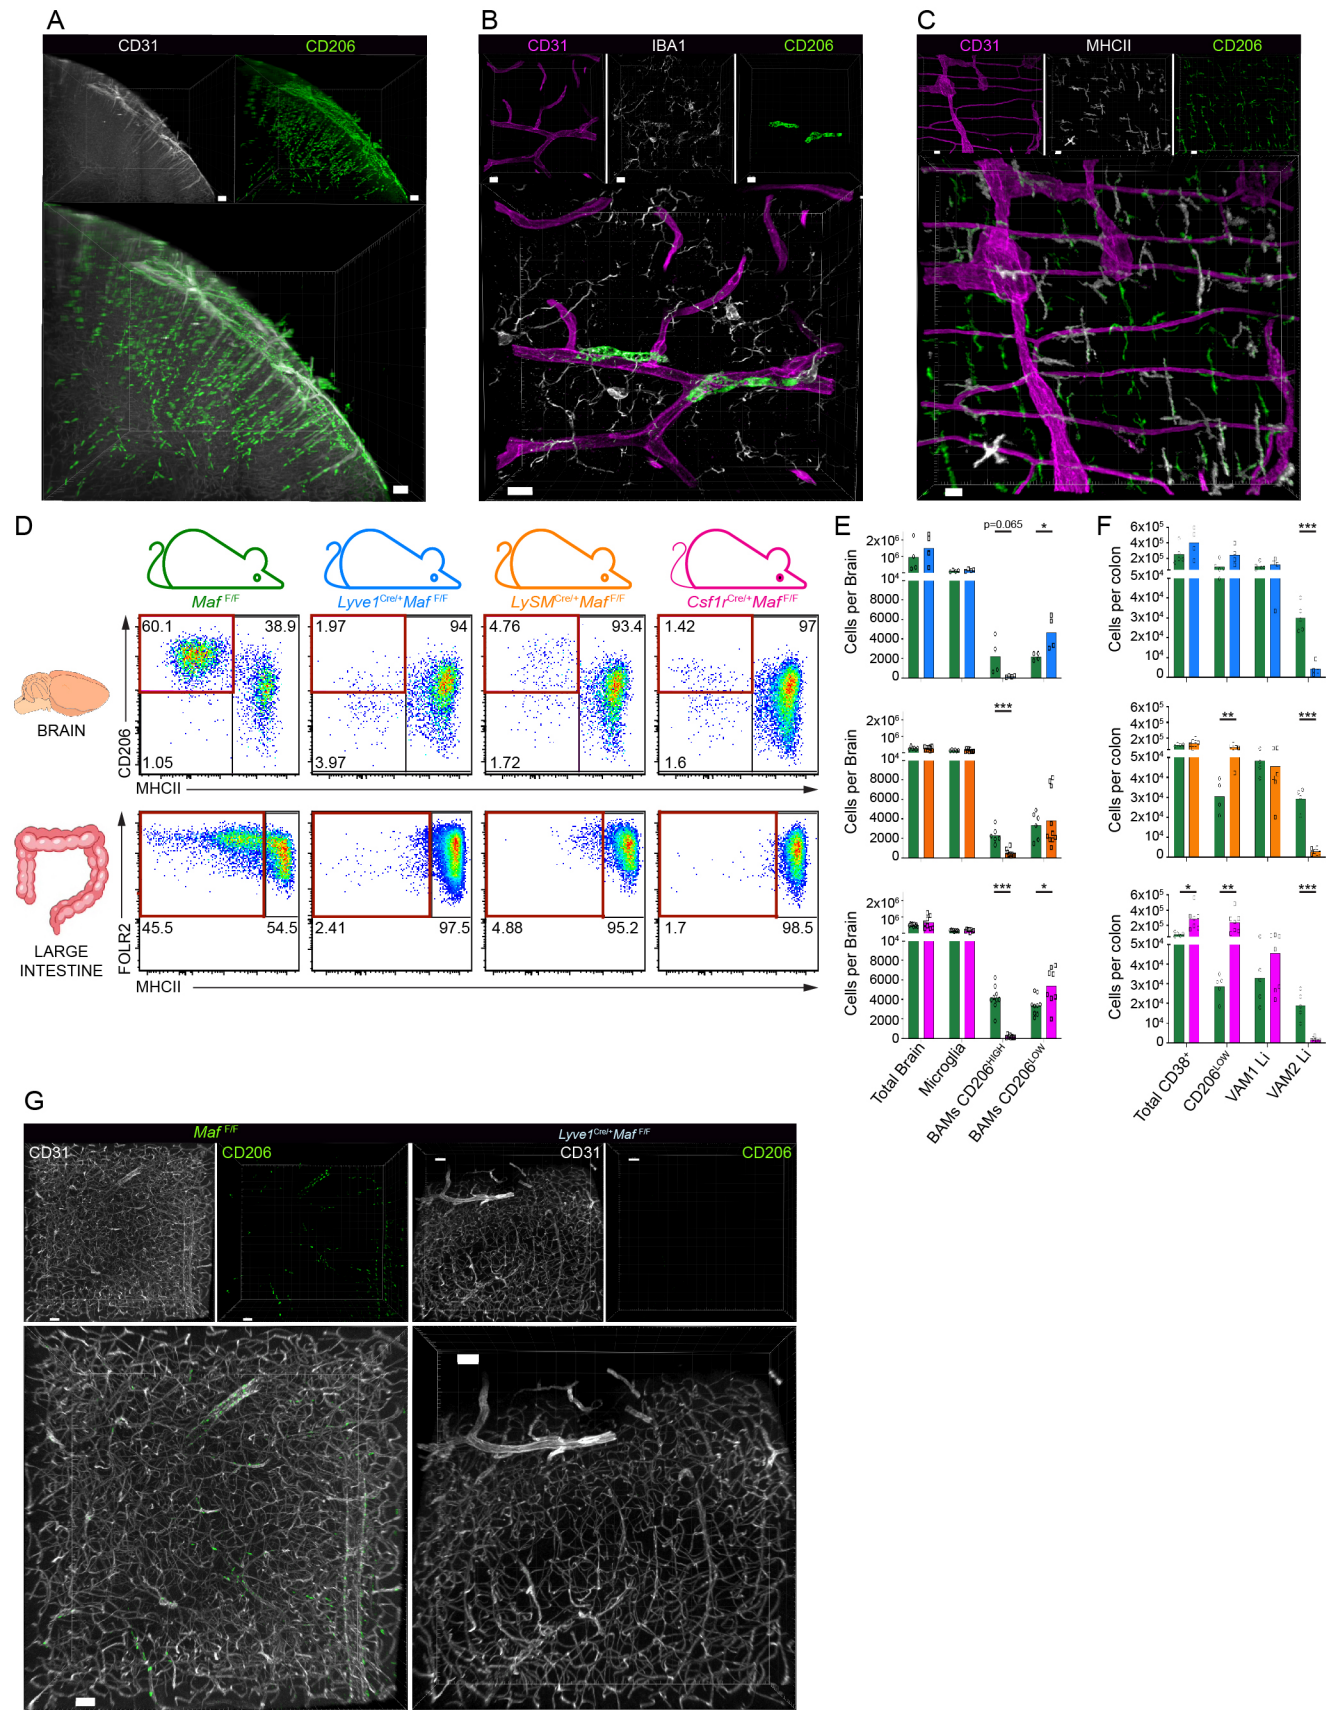

**Fig. 3. The transcription factor c-MAF is fundamental for the phenotype of VAM like**

perivascular macrophages in the brain and gut. (A) CD206<sup>HIGH</sup> macrophages are also

bioRxiv preprint doi: <https://doi.org/10.1101/2021.02.07.430147>; this version posted February 8, 2021. The copyright holder for this preprint (which was not certified by peer review) is the author/funder. All rights reserved. No reuse allowed without permission.

tightly associated with blood vessels in the brain and gut of adult WT mice. Lightsheet microscopy of a full mouse brain frontal cortex after clarification and stained with anti-CD206 (Green) and anti-CD31 (White). Scale Bars, 100  $\mu$ m. 4x magnification. (B) Clarified brain stained with anti-CD206 (Green), anti-CD31 (Magenta) and anti-IBA1 (White). Scale Bars, 10  $\mu$ m. 63x magnification. (C) Colon *muscularis* stained with anti-CD206 (Green), anti-CD31 (Magenta) and anti-MHCII (White). Scale Bars, 20  $\mu$ m. 20x magnification. Images representative of at least n = 3. (D) Impact of *Maf* ablation in brain and gut CD206<sup>HIGH</sup> macrophages. Each column represents macrophages populations of the animal depicted in the top. Each row represents cells from the organ shown in the left. The gates in maroon color highlights the lost of cells with a typical CD206<sup>HIGH</sup> perivascular phenotype in the conditional knockout models used. Percentage of cells is shown. Representative dot plots of at least n=3. (E) Total brain cell numbers in the different conditional knockout models used in (D). (F) Total colon cell numbers in the different conditional knockout models used in (D). Graph bar colors correspond to the models listed in (D). For each model, littermate controls were used as *Maf*<sup>F/F</sup> WT controls. (G) Confocal image of a clarified brain of *Lyve1*<sup>Cre</sup>*Maf*<sup>F/F</sup> and littermate control mice demonstrating the ablation of BAMs CD206<sup>HIGH</sup>. Brains were stained with anti-CD206 (Green), anti-CD31 (white). Scale Bars, 50  $\mu$ m. 10x magnification. Representative images. n=3. Each dot in the bar graphs represents one animal. Bar graphs display mean values. See also Fig. S3 and S4.



FIGURE 4

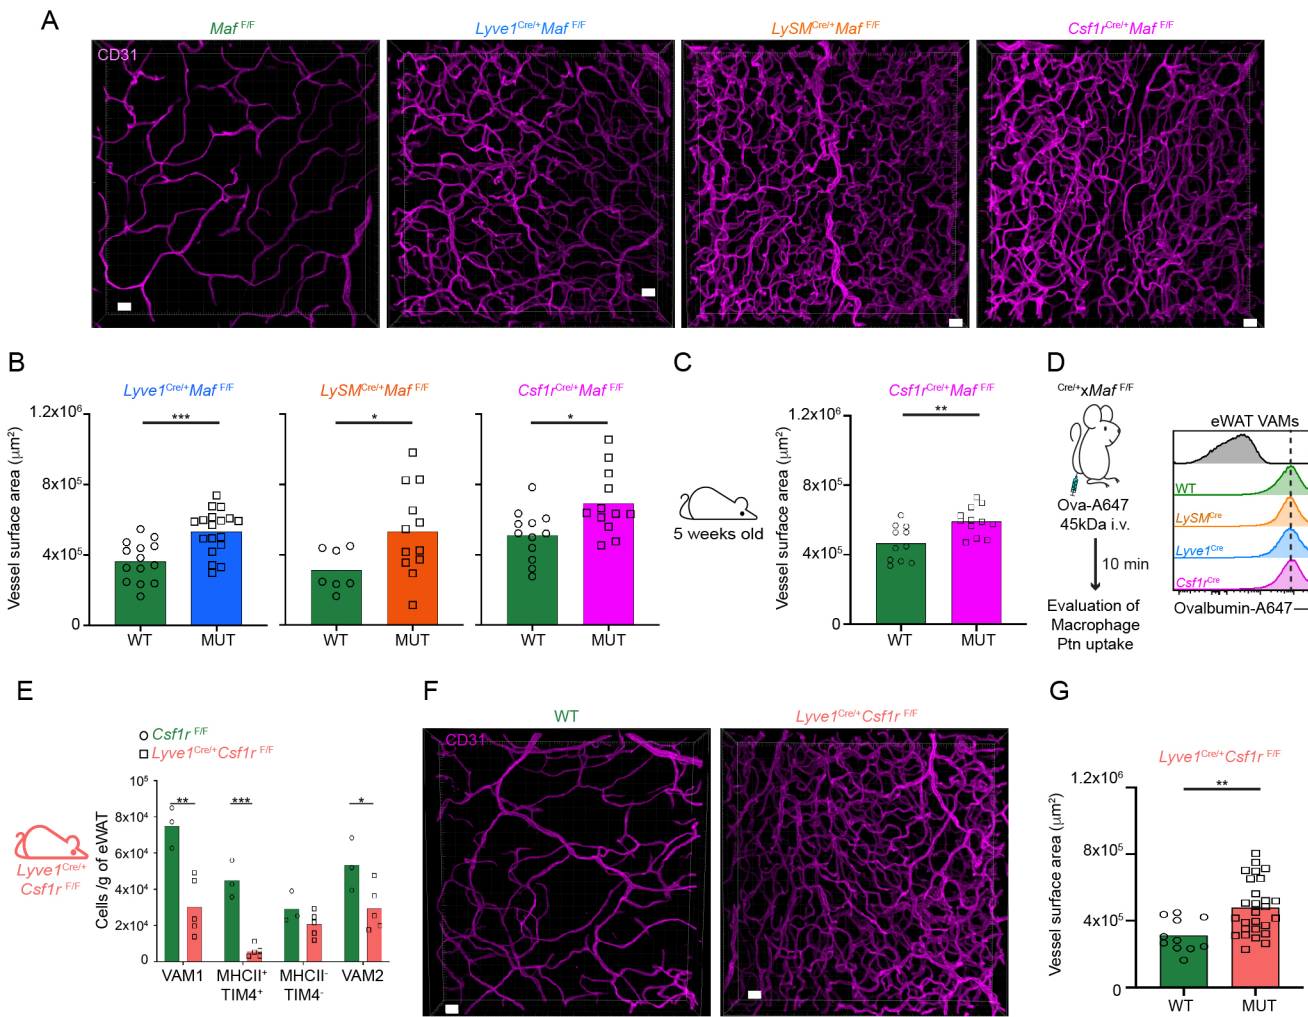

**Fig. 4. *Maf* ablation in perivascular macrophages leads to increased vascular density**

bioRxiv preprint doi: <https://doi.org/10.1101/2021.02.07.430147>; this version posted February 8, 2021. The copyright holder for this preprint (which was not certified by peer review) is the author/funder. All rights reserved. No reuse allowed without permission.

**in the eWAT. (A)** Confocal images of clarified eWAT from animals *Lyve1<sup>Cre</sup>Maf<sup>F/F</sup>*, *LySM<sup>Cre</sup>Maf<sup>F/F</sup>*, *Csf1r<sup>Cre</sup>Maf<sup>F/F</sup>* and littermate control stained with anti-CD31 (Magenta). Scale Bars, 20  $\mu$ m. 20x magnification. Representative images.  $n \geq 3$ . **(B)** Quantification of the vascular surface area assessed by the anti-CD31 staining observed in **(A)**. Three to four 50 $\mu$ m deep images were taken per animal and the vascular surface area reconstructed using the IMARIS software. Each dot represents the quantification for each picture.  $n \geq 3$ . Representative of 3 independent experiments. **(C)** Quantification of the vascular surface area assessed by the anti-CD31 staining of young 5 weeks old *Csf1r<sup>Cre</sup>Maf<sup>F/F</sup>* mice. Three to four 50 $\mu$ m deep images were taken per animal and the vascular surface area reconstructed using the IMARIS software. Each dot represents the quantification for each picture.  $n = 3$ . **(D)** Evaluation of the endocytic capacity of eWAT VAMs in the different animal models used in **(A)**. Ovalbumin-A647 (Ova-A647) was injected i.v. and after the depicted time the uptake of ovalbumin was measured by flow cytometry in the eWAT. Representative histograms;  $n = 3$ . The dashed line represents the median fluorescence intensity of the WT VAMs. **(E)** Distribution of eWAT macrophages per gram of adipose tissue in *Lyve1<sup>Cre</sup>Csf1r<sup>F/F</sup>* mice. Littermate controls were used as *Csf1r<sup>F/F</sup>* WT controls. Each dot in the bar graphs represents one animal. Representative of 3 independent experiments. **(F)** *Lyve1<sup>Cre</sup>Csf1r<sup>F/F</sup>* mice display increased vascular density in the eWAT. Confocal images of clarified eWAT stained with anti-CD31 (Magenta). Scale Bars, 20  $\mu$ m. 20x magnification. Representative images.  $n \geq 3$ . **(G)** Quantification of the vascular surface area assessed by the anti-CD31 staining observed in **(F)**. Three to four 50 $\mu$ m deep images were taken per animal and the vascular surface area reconstructed using the IMARIS software. Each dot represents the quantification for each picture.  $n \geq 3$ . Representative of 2 independent experiments. Bar graphs display mean values. See also Fig. S5.

FIGURE 5

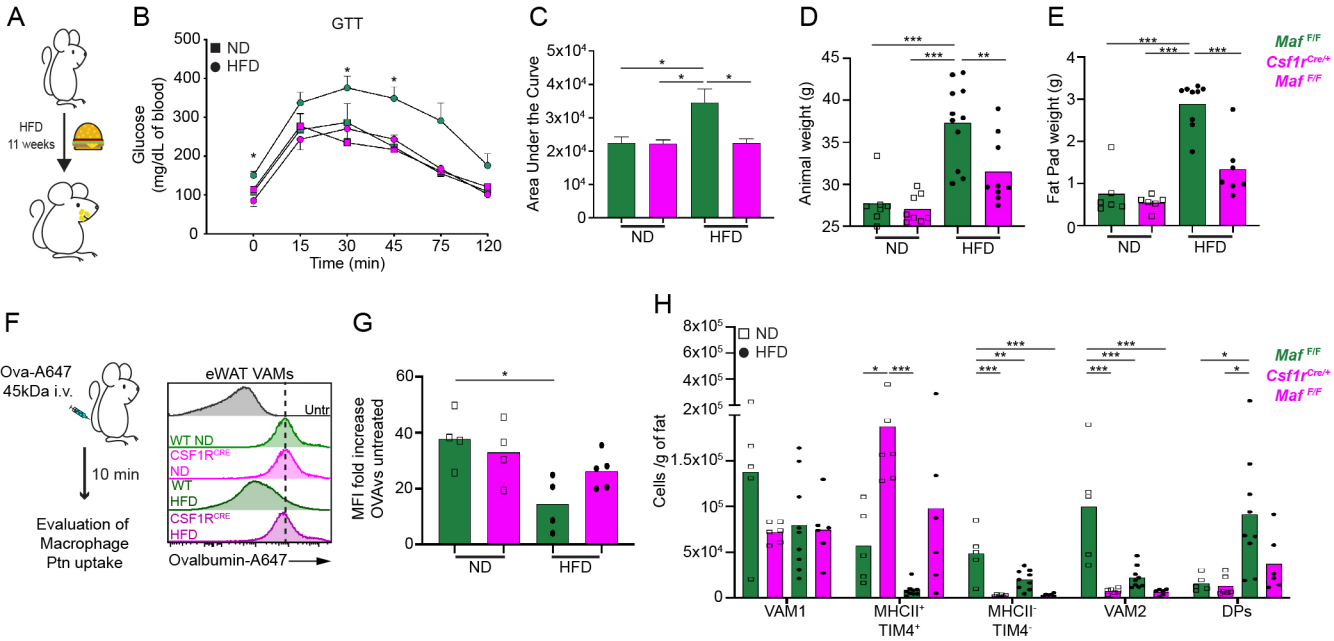

**Fig. 5. *Maf* ablation in macrophages protects animals from the early onset of metabolic**

bioRxiv preprint doi: <https://doi.org/10.1101/2021.02.07.430147>; this version posted February 8, 2021. The copyright holder for this preprint (which was not certified by peer review) is the author/funder. All rights reserved. No reuse allowed without permission.

**syndrome.** (A) Experimental design for (B-F). (B) Glucose tolerance test (GTT) of *Csf1<sup>Cre</sup>Maf<sup>F/F</sup>* mice and littermate controls under normal or high fat diet (ND or HFD). n>3. Representative of 3 independent experiments. (C) Area under the curve of the GTT displayed in (B) (Arbitrary units). Bar graphs display mean±SEM. (D, E) Animal weight and eWAT fat pads weight of animals depicted in (B). (F) Evaluation of eWAT VAMs endocytic capacity in animals submitted to HFD. Ovalbumin-A647 (Ova-A647) was injected i.v. and after the depicted time the uptake of ovalbumin was measured by flow cytometry in the eWAT. Representative histograms; n ≥4. The dashed line represents the median fluorescence intensity of macrophages from animals under ND regimen. (G) Fold increase of the median ovalbumin-A647 fluorescence intensity after injection as depicted in (F) normalized to the individual autofluorescence of each subpopulation, n≥4. Each dot in the bar graphs represents one animal. Bar graphs display mean values. (H) Distribution of VAMs and DPs (CD11c<sup>+</sup>CD64<sup>+</sup>) macrophages per gram of eWAT in the animals depicted in (B). Each dot in the bar graphs represents one animal. Bar graphs display mean values. DPs: Double positive macrophages were gated as CD45<sup>+</sup>Lin<sup>-</sup>CD11b<sup>+</sup>CD206<sup>LOW/INT</sup>MHCII<sup>+</sup>CD64<sup>+</sup>CD11c<sup>+</sup>. See also Fig. S6.

# Supplementary Fig. 1

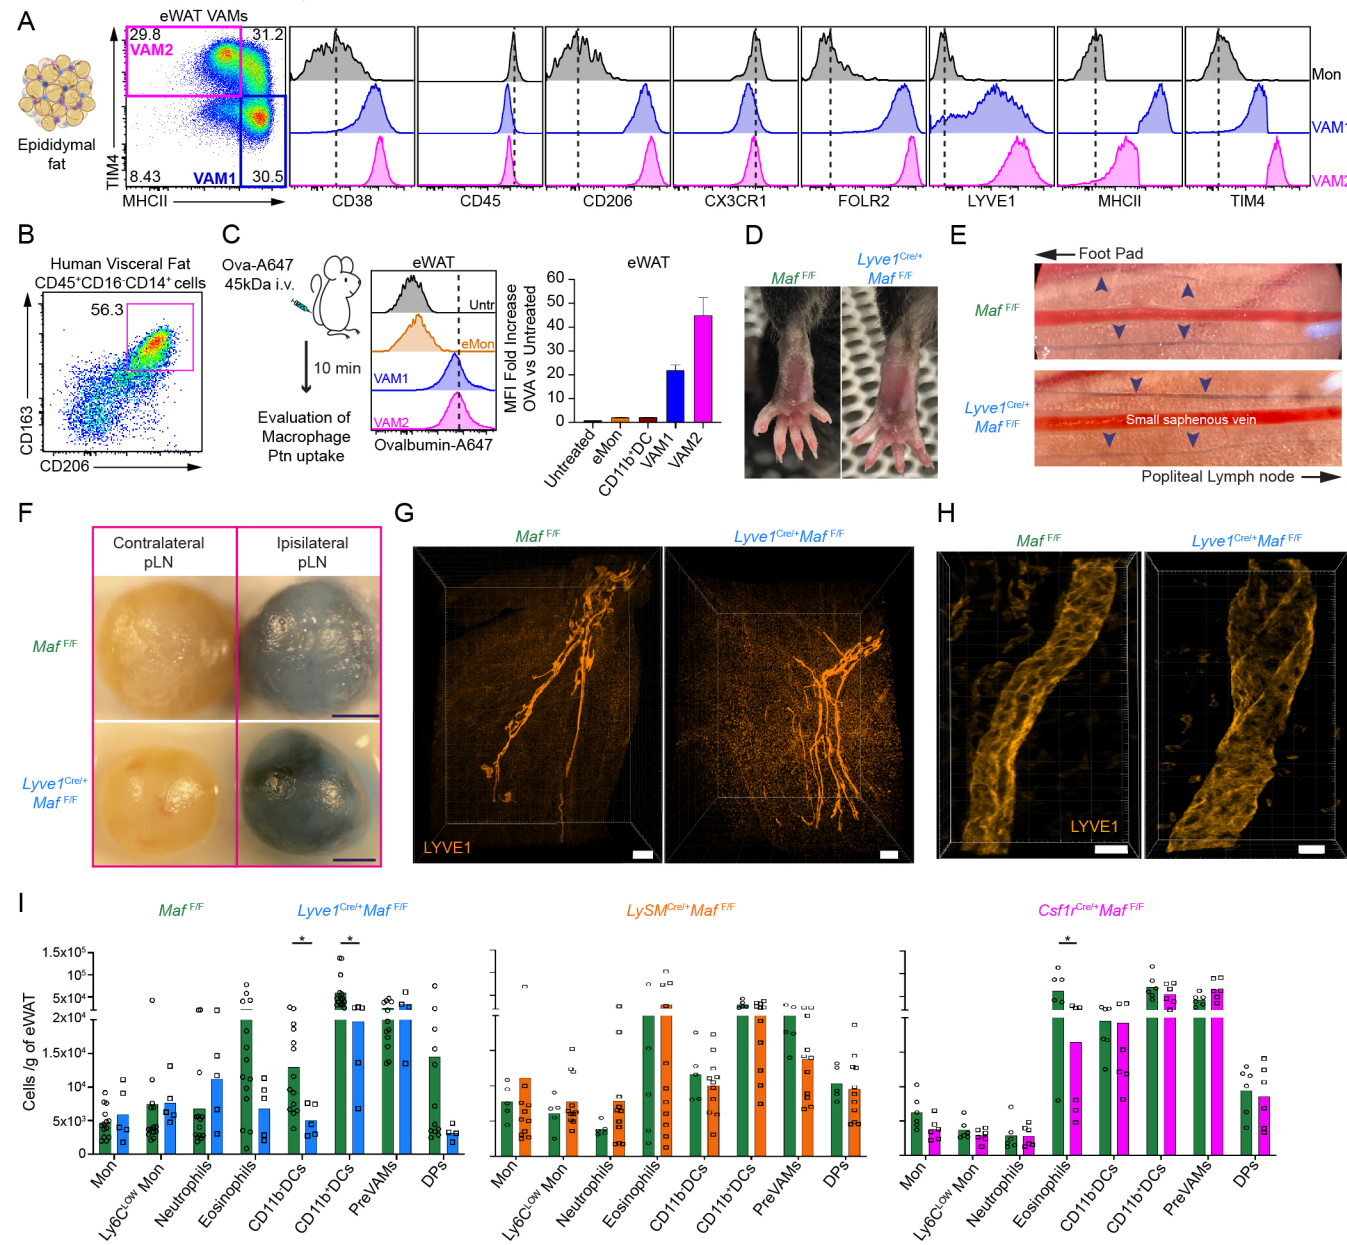



**Fig. S1. Distribution of perivascular macrophages expressing CD38<sup>+</sup>Fcrl2<sup>+</sup>CD206<sup>HIGH</sup> in**

the eWAT. (A) Flow cytometry analysis of cell surface markers expressed by VAMs in adult WT C57BL/6 mice. eWAT VAMs were gated as CD45<sup>+</sup>Lin<sup>-</sup>CD11b<sup>+</sup>CD64<sup>+</sup>CD206<sup>HIGH</sup>. The magenta and blue gates correspond to VAM2 and VAM1, respectively. (B) Flow cytometry analysis of human visceral fat macrophages. Percentage of cells is shown. Representative dot plot. n=3. (C) VAMs are highly endocytic *in vivo*. Ovalbumin-A647 (Ova-A647) was injected i.v. and after the depicted time the uptake of Ovalbumin was measured by flow cytometry. VAMs gated as mentioned in (A). Representative histograms; n = 3. Dashed lines represent the median fluorescence intensity of the VAM2. Bar graphs show the fold increase of the median ovalbumin-A647 fluorescence intensity after injection normalized to the individual autofluorescence of each subpopulation, n = 3. CD11b<sup>+</sup>DCs gated as CD45<sup>+</sup>Lin<sup>-</sup>CD11b<sup>+</sup>CD64<sup>-</sup>CD11c<sup>+</sup>MHCII<sup>+</sup>. Bar graphs display mean±SEM. (D) *Lyve1<sup>Cre</sup>Maf<sup>F/F</sup>* mice do not show abnormality in liquid drainage from extremities. Foot pad were not swollen in these animals. Representative figure n=5. (E) *Lyve1<sup>Cre</sup>Maf<sup>F/F</sup>* mice display functional lymphatic vessels. Evans blue dye (40mg/ml) was injected in one hind foot pad of *Lyve1<sup>Cre</sup>Maf<sup>F/F</sup>* or littermate controls and the dye drainage through lymphatic vessels around the small saphenous vein was visualized 30 min post injection. Blue arrowheads are indicating evans blue loaded lymphatic vessels. Representative figure. n=3 for each group. (F) Evans blue dye is efficiently drained into the Popliteal lymph node of *Lyve1<sup>Cre</sup>Maf<sup>F/F</sup>*. Lymph nodes of the experiment depicted in (E) are shown. pLN = Popliteal lymph node. Scale Bars, 500 μm. Representative figure. n=3 for each group. (G) *Lyve1<sup>Cre</sup>Maf<sup>F/F</sup>* mice display a preserved capacity to form a lymphatic vessel tree within the eWAT. Whole eWAT fat pad were clarified, stained with LYVE1 (Orange) and imaged using a light sheet microscope. Scale Bars, 300 μm. 4x magnification. (H) Lymphatic vessels of *Lyve1<sup>Cre</sup>Maf<sup>F/F</sup>* display a similar structure to those observed in littermate controls. Clarified eWAT were stained with LYVE1 (Orange) and imaged using a confocal microscope. Scale Bars, 20 μm. 20x magnification. Representative images. (I) Distribution of myeloid cells per gram of eWAT in the different conditional knockout models used in main Fig. 1E. Graph bar colors correspond to the models listed in main Fig. 1E. For each model, littermate controls were used as *Maf<sup>F/F</sup>* WT controls. Ly6C<sup>LOW</sup> Mon: Ly6C<sup>LOW</sup> Monocytes were gated as CD45<sup>+</sup>Lin<sup>-</sup>CD11b<sup>+</sup>CX3CR1<sup>+</sup>MHCII<sup>-</sup>Ly6C<sup>LOW</sup>. Neutrophils were gated as CD45<sup>+</sup>CD11b<sup>+</sup>MHCII<sup>-</sup>Ly6G<sup>+</sup>. Eosinophils were gated as CD45<sup>+</sup>CD11b<sup>+</sup>MHCII<sup>-</sup>SSC<sup>HIGH</sup>SiglecF<sup>+</sup>. PreVAMs were gated as CD45<sup>+</sup>Lin<sup>-</sup>CD11b<sup>+</sup>CD206<sup>LOW/INT</sup>MHCII<sup>+</sup>CD64<sup>+</sup>CD11c<sup>-</sup>. DPs: Double positive macrophages were gated as CD45<sup>+</sup>Lin<sup>-</sup>CD11b<sup>+</sup>CD206<sup>LOW/INT</sup>MHCII<sup>+</sup>CD64<sup>+</sup>CD11c<sup>+</sup>. CD11b<sup>-</sup>DCs were gated as CD45<sup>+</sup>Lin<sup>-</sup>CD11b<sup>-</sup>CD64<sup>-</sup>CD11c<sup>+</sup>MHCII<sup>+</sup>. Ptn: Protein. Lin: CD90<sup>+</sup>CD19<sup>+</sup>Ly6G<sup>+</sup>SiglecF<sup>+</sup>.

# Supplementary Figure 2

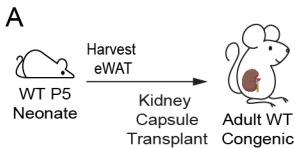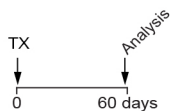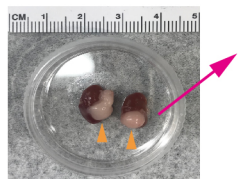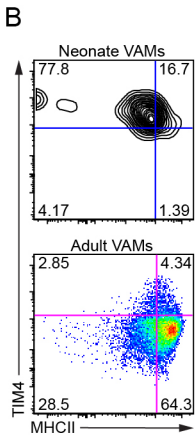

**Fig. S2. Adult VAM2s do not develop from bone marrow progenitors.** (A) Experimental design for (B). (B) Phenotype of organ resident VAMs (Neonate versus BM derived VAMs (Adult VAMs) originated from the transplant recipient that migrated to the transplanted eWAT under the kidney capsule as explained in (A) VAMs (gated as  $CD45^+Lin^-CD11b^+CD64^+CD206^{HIGH}$ ). Representative dot plot. n=4. Percentage of cells is shown.

# Supplementary Figure 3

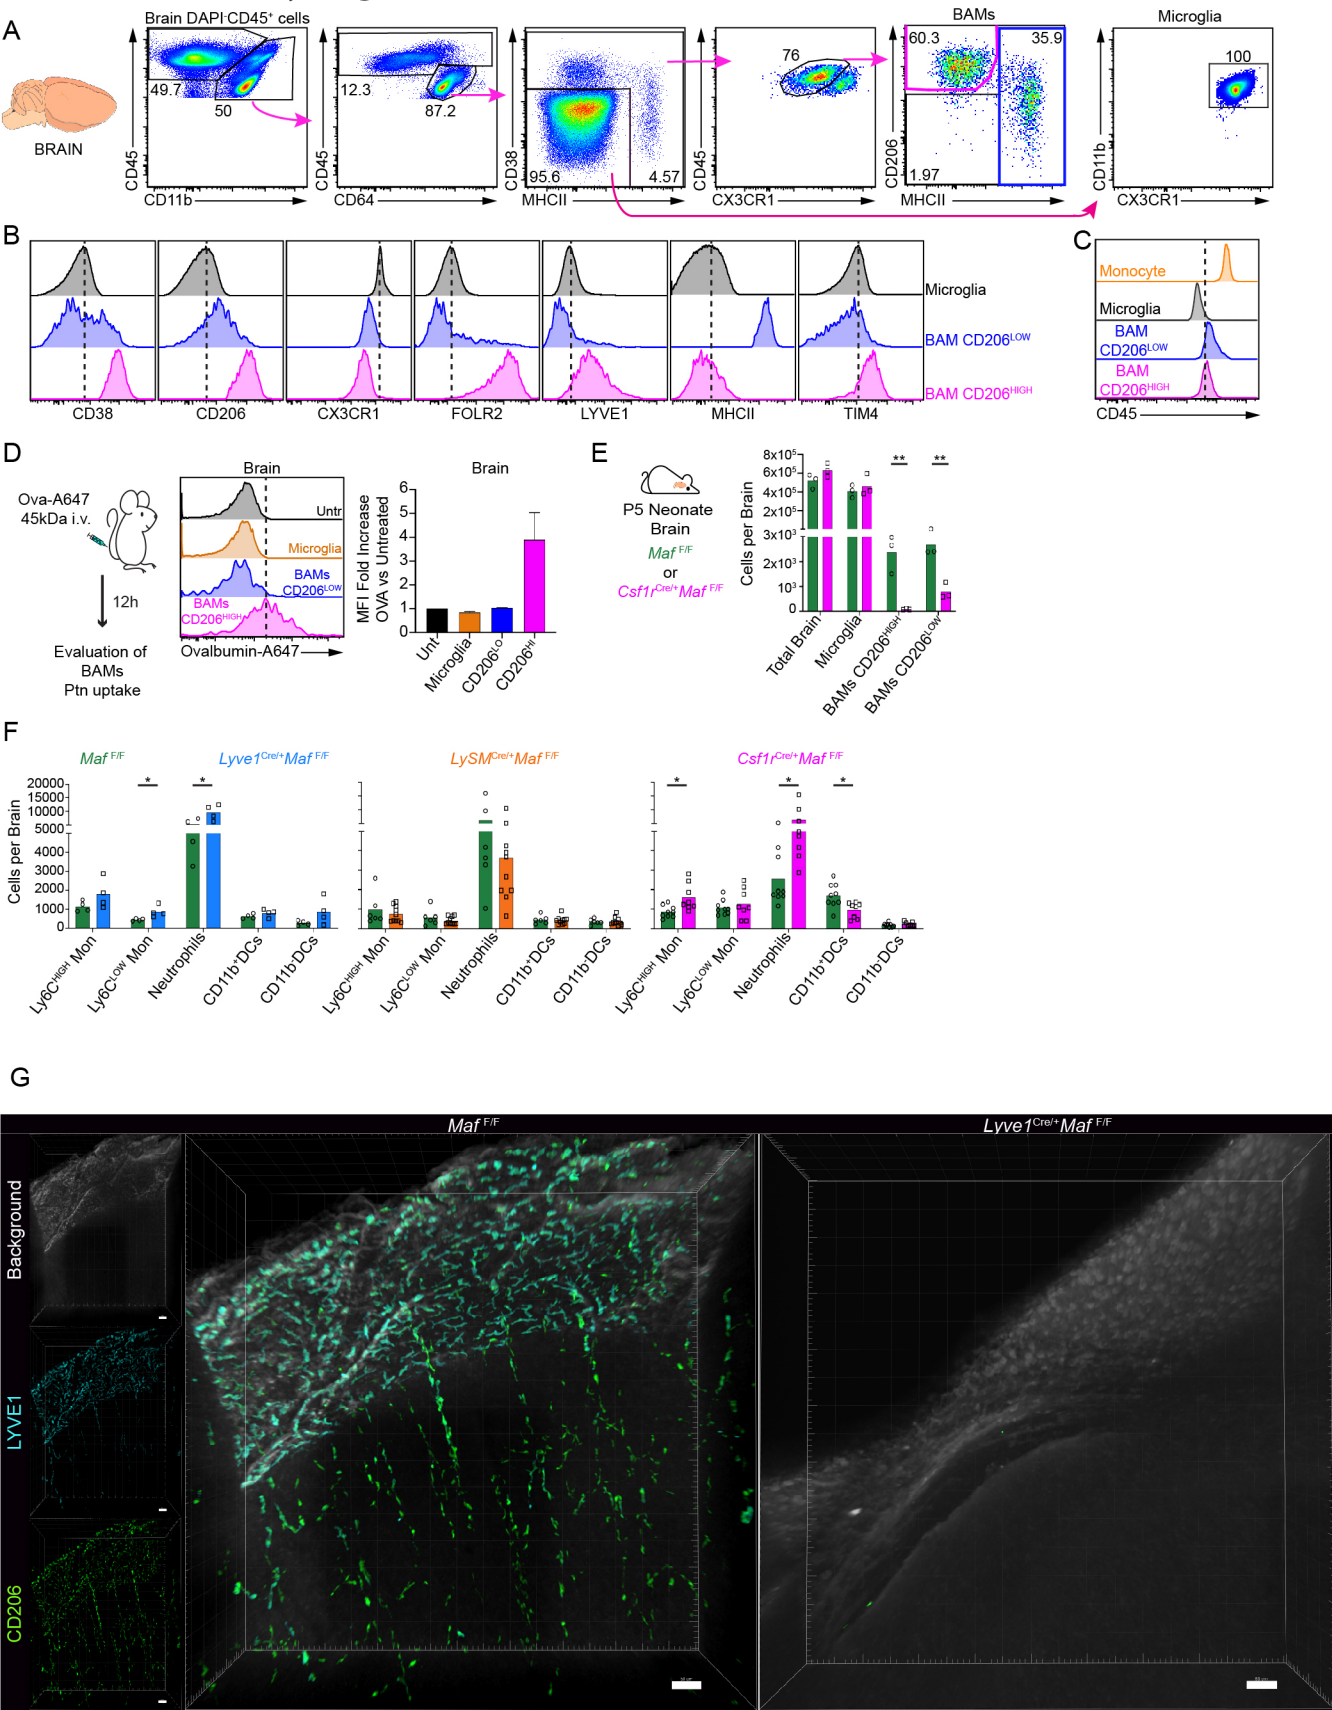

### Fig. S3. Brain BAMs CD206<sup>HIGH</sup> share key similarities and *Maf*-dependence with eWAT

bioRxiv preprint doi: <https://doi.org/10.1101/2021.02.07.430147>; this version posted February 8, 2021. The copyright holder for this preprint (which was not certified by peer review) is the author/funder. All rights reserved. No reuse allowed without permission.

### VAM2 (A) Flow cytometry gate strategy used to analyze brain perivascular macrophages.

Percentage of cells is shown. (B) Flow cytometry analysis of cell surface markers expressed by BAMs. Histograms represent the pink and blue gates depicted in the BAMs dot plot in (A). Representative histograms of at least n=5. Dashed lines represent the median fluorescence intensity of microglia as a comparative measure in the organ. (C) BAMs CD206<sup>HIGH</sup> express lower levels of CD45 in relation to bone marrow derived monocytes. n≥5. Monocytes were gated as CD45<sup>+</sup>Lin<sup>-</sup>CD11b<sup>+</sup>CX3CR1<sup>+</sup>MHCII<sup>-</sup>Ly6C<sup>HIGH</sup>. (D) BAMs CD206<sup>HIGH</sup> are highly endocytic *in vivo*. Ovalbumin-A647 (Ova-A647) was injected i.v. and after the depicted time the uptake of Ovalbumin was measured by flow cytometry. BAMs gated as mentioned in (A). Representative histograms; n = 3. Dashed lines represent the median fluorescence intensity of the BAMs CD206<sup>HIGH</sup>. Bar graphs show the fold increase of the median ovalbumin-A647 fluorescence intensity after injection normalized to the individual autofluorescence of each subpopulation, n = 3. Bar graphs display mean±SEM. (E) Neonate Brains (P5) show early ablation of BAMs CD206<sup>HIGH</sup>. Total Brain cell numbers in *Csf1<sup>Cre</sup>Maf<sup>F/F</sup>*. Littermate controls were used as *Maf<sup>F/F</sup>* WT controls. n=3. Representative of 2 independent experiments. (F) Distribution of myeloid cells per brain in the different conditional knockout models used in main Fig. 3 D, E. For each model, littermate controls were used as *Maf<sup>F/F</sup>* WT controls. (G) Confocal image of clarified brains of *Lyve1<sup>Cre</sup>Maf<sup>F/F</sup>* and littermate control mice demonstrating the ablation of BAMs CD206<sup>HIGH</sup>. Brains were stained with anti-CD206 (Green), anti-LYVE1 (Cyan) and the background (White). Scale Bars, 20 μm. 20x magnification. Representative images. n=3. Ly6C<sup>LOW</sup> Mon: Ly6C<sup>LOW</sup> Monocytes were gated as CD45<sup>+</sup>Lin<sup>-</sup>CD11b<sup>+</sup>CX3CR1<sup>+</sup>MHCII<sup>-</sup>Ly6C<sup>LOW</sup>. Neutrophils were gated as CD45<sup>+</sup>CD11b<sup>+</sup>MHCII<sup>-</sup>Ly6G<sup>+</sup>. CD11b<sup>-</sup>DCs were gated as CD45<sup>+</sup>Lin<sup>-</sup>CD11b<sup>-</sup>CD64<sup>-</sup>CD11c<sup>+</sup>MHCII<sup>+</sup>. CD11b<sup>+</sup>DCs were gated as CD45<sup>+</sup>Lin<sup>-</sup>CD11b<sup>+</sup>CD64<sup>-</sup>CD11c<sup>+</sup>MHCII<sup>+</sup>. Ptn: Protein. Lin: CD90<sup>+</sup>CD19<sup>+</sup>Ly6G<sup>+</sup>SiglecF<sup>+</sup>.



# Supplementary Figure 4

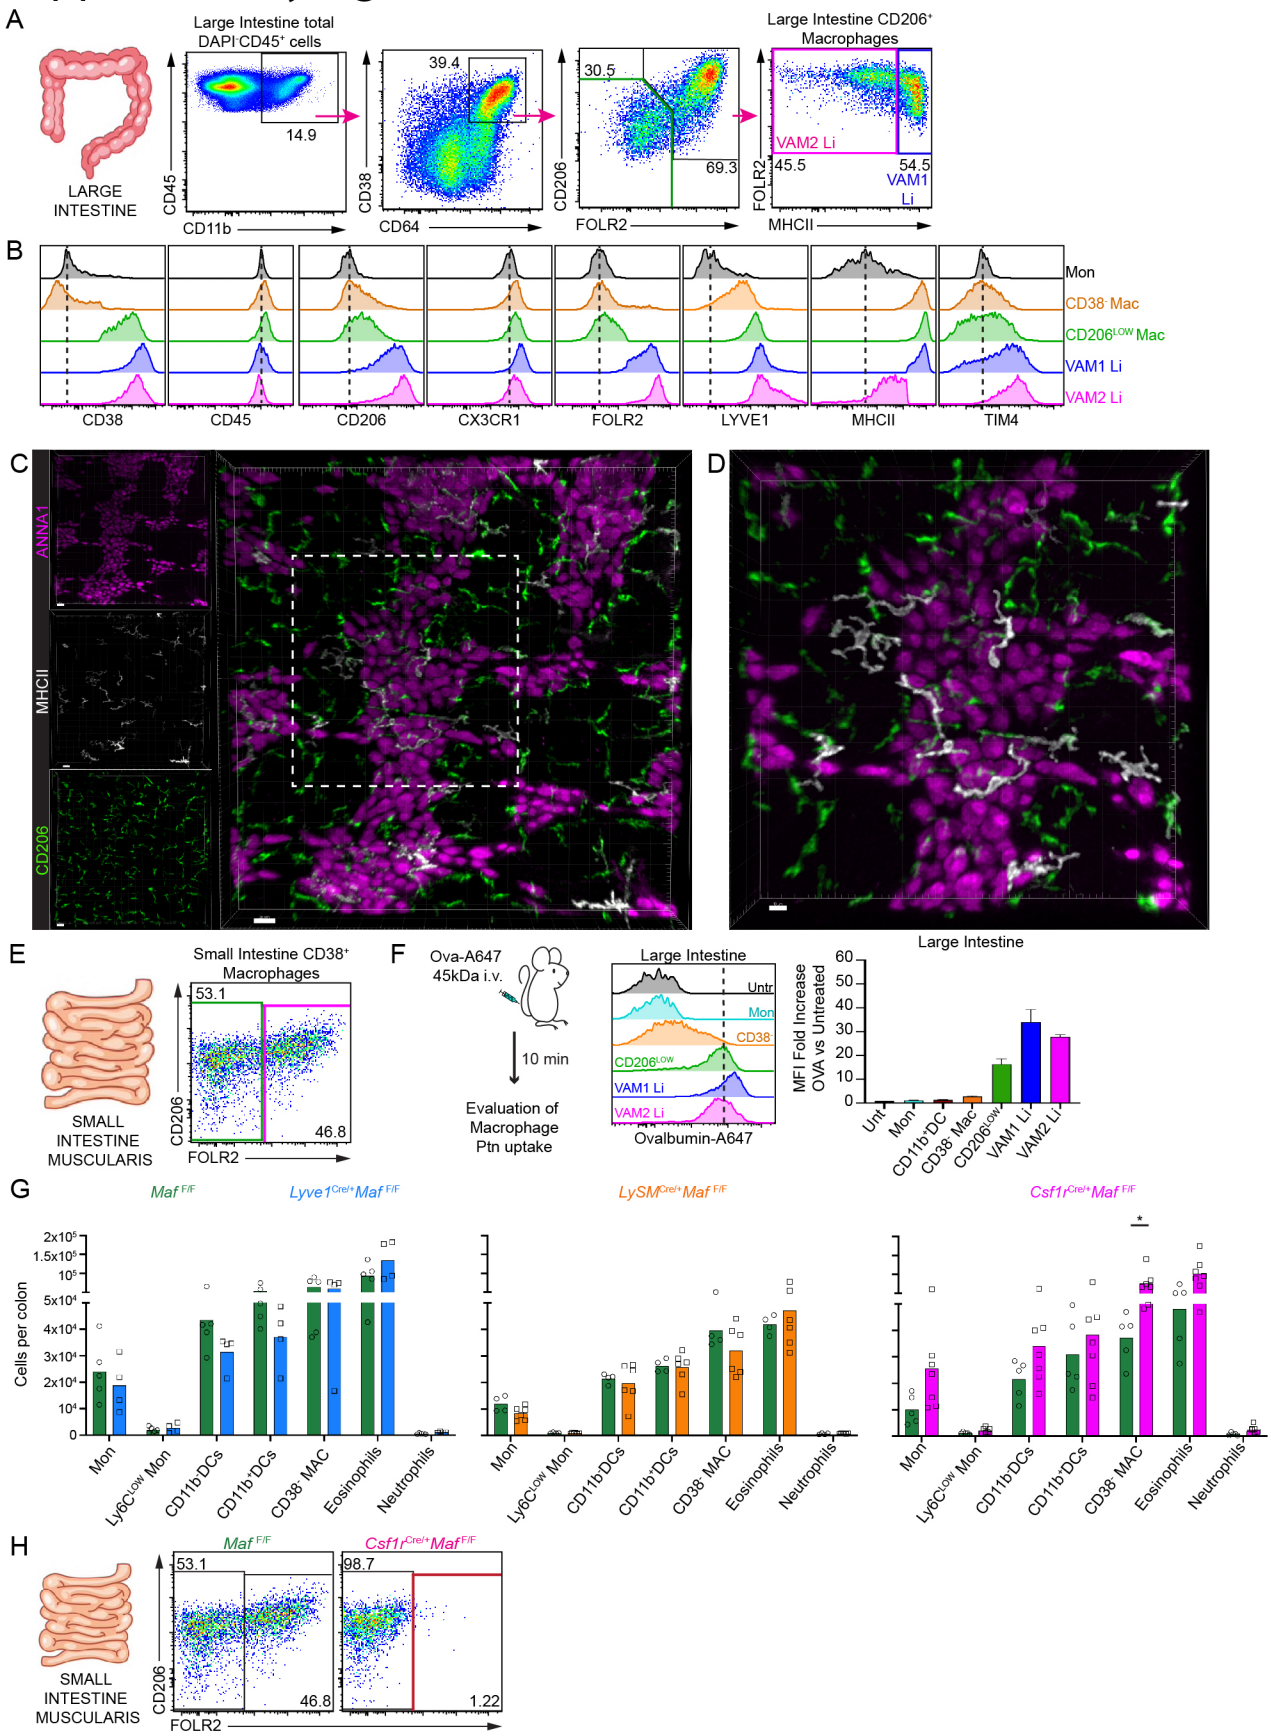

**Fig. S4. CD206<sup>HIGH</sup> macrophages from the large intestine display a phenotype that**

resembles eWAT VAMs. (A) Flow cytometry gate strategy used to analyze large intestine

(Li) macrophages of mice used in this study. Percentage of cells is shown. (B) Flow cytometry analysis of cell surface markers expressed by VAMs from Li. Histograms represent the magenta, blue and green gates depicted in the Li macrophages in (A). CD38<sup>-</sup> Mac: CD38<sup>-</sup> macrophages were gate as CD45<sup>+</sup>CD11b<sup>+</sup>CD64<sup>+</sup>CD38<sup>-</sup>MHCII<sup>+</sup>. Mon: Monocytes were gated as CD45<sup>+</sup>Lin<sup>-</sup>CD11b<sup>+</sup>CX3CR1<sup>+</sup>MHCII<sup>+</sup>Ly6C<sup>HIGH</sup>. Representative histograms of at least n=5. Dashed lines represent the median fluorescence intensity of monocytes as a comparative measure in the organ. (C) VAMs Li are also localized in close proximity to enteric-associated neurons in the large intestine myenteric plexus of adult WT mice. Colon stained with anti-CD206 (Green), anti-ANNA-1 (Magenta - neuron body) and anti-MHCII (White). Scale Bars, 20  $\mu$ m. 20x magnification. n = 3. (D) Same as in c in higher details. Figure depicts the white box shown in (C) showing in details the close proximity of perivascular macrophages to enteric-associated neurons. Scale Bars, 10  $\mu$ m. 20x magnification. (E) The small intestine *muscularis* layer also display VAM related macrophages (pink) and non-related (green) perivascular macrophages. Cells were gated as depicted in (A). Percentage of cells is shown. n=3. (F) VAMs Li are highly endocytic *in vivo*. Ovalbumin-A647 (Ova-A647) was injected i.v. and after the depicted time the uptake of Ovalbumin was measured by flow cytometry. VAMs Li gated as mentioned in (A). Representative histograms; n = 3. Dashed lines represent the median fluorescence intensity of the VAM2 Li. Bar graphs show the fold increase of the median ovalbumin-A647 fluorescence intensity after injection normalized to the individual autofluorescence of each subpopulation, n = 3. CD11b<sup>+</sup>DCs gated as CD45<sup>+</sup>Lin<sup>-</sup>CD11b<sup>+</sup>CD64<sup>-</sup>CD11c<sup>+</sup>MHCII<sup>+</sup>. Bar graphs display mean $\pm$ SEM. (G) Distribution of myeloid cells per colon in the different conditional knockout models used in main fig. 3D and fig. 3F. For each model, littermate controls were used as *Maf*<sup>F/F</sup> WT controls. (H) Representative dot plot demonstrating the impact of *Maf* deletion in the small intestine *muscularis* layer of animals *Csf1*<sup>Cre</sup>*Maf*<sup>F/F</sup>. Each dot in the bar graphs represents one animal. Bar graphs display mean values. Ly6C<sup>LOW</sup> Mon: Ly6C<sup>LOW</sup> Monocytes were gated as CD45<sup>+</sup>Lin<sup>-</sup>CD11b<sup>+</sup>CX3CR1<sup>+</sup>MHCII<sup>-</sup>Ly6C<sup>LOW</sup>. Neutrophils were gated as CD45<sup>+</sup>CD11b<sup>+</sup>MHCII<sup>-</sup>Ly6G<sup>+</sup>. Eosinophils were gated as CD45<sup>+</sup>CD11b<sup>+</sup>MHCII<sup>-</sup>SSC<sup>HIGH</sup>SiglecF<sup>+</sup>. CD11b<sup>-</sup>DCs were gated as CD45<sup>+</sup>Lin<sup>-</sup>CD11b<sup>-</sup>CD64<sup>-</sup>CD11c<sup>+</sup>MHCII<sup>+</sup>. CD11b<sup>+</sup>DCs were gated as CD45<sup>+</sup>Lin<sup>-</sup>CD11b<sup>+</sup>CD64<sup>-</sup>CD11c<sup>+</sup>MHCII<sup>+</sup>. Mac: Macrophage. Ptn: Protein. Lin: CD90<sup>+</sup>CD19<sup>+</sup>Ly6G<sup>+</sup>SiglecF<sup>+</sup>.

# Supplementary Figure 5

A

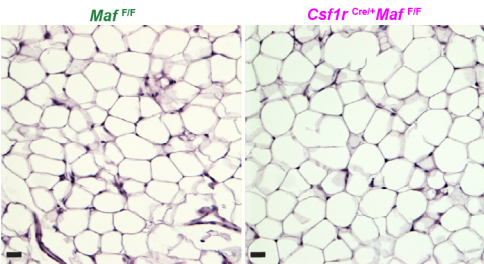

B

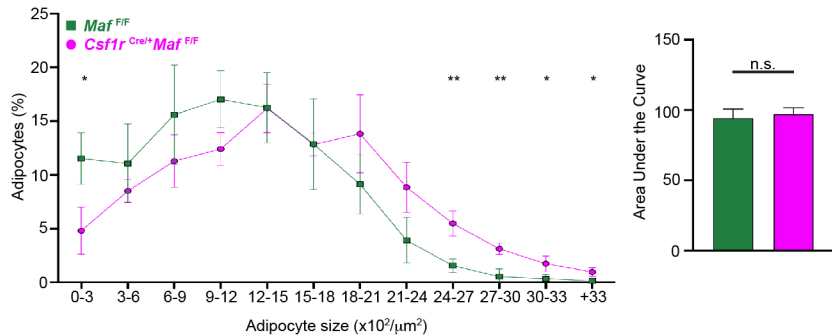

**Fig. S5. eWAT adipocyte size distribution is mostly preserved in young *Csf1r<sup>Cre</sup> Maf<sup>F/F</sup>***

bioRxiv preprint doi: <https://doi.org/10.1101/2021.02.07.430147>; this version posted February 8, 2021. The copyright holder for this preprint (which was not certified by peer review) is the author/funder. All rights reserved. No reuse allowed without permission.

mice. (A) eWAT h&e staining/sectioning of the animals depicted in the main fig. 4C. Scale Bars, 20  $\mu$ m. 20x magnification. Representative images. n=3. (B) Distribution of adipocytes sizes over the total number of adipocytes evaluated from animals depicted in (A). For each animal at least 6 randomly acquired h&e sections were analyzed. An average of 380 adipocytes were evaluated per animal using ImageJ software. Area under the curve was evaluated using the graph prism v.8 software.

# Supplementary Figure 6

A

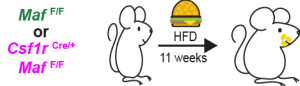

B

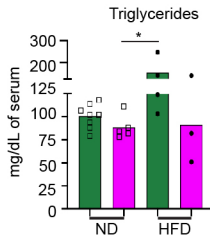

C

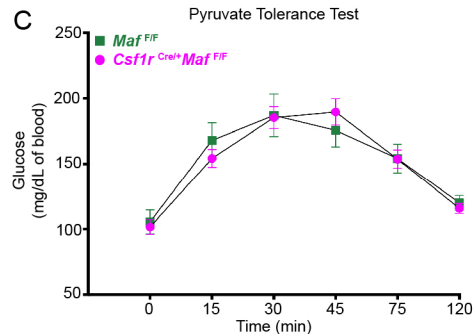

D

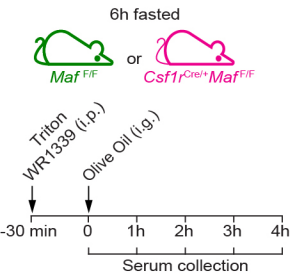

E

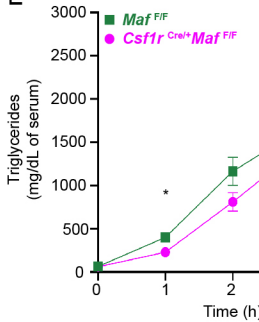

F

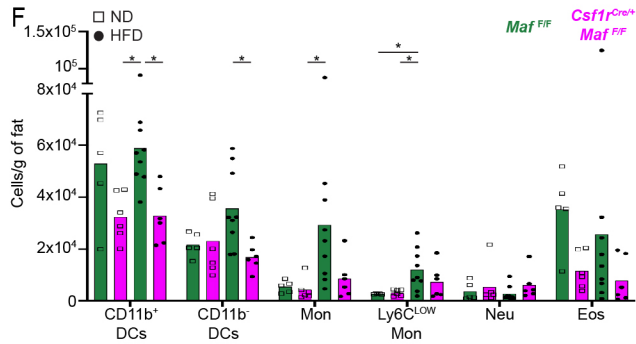



**Fig. S6. Animals *Csf1r<sup>Cre</sup>Maf<sup>F/F</sup>* display improved metabolic parameters under HFD. (A)**

bioRxiv preprint doi: <https://doi.org/10.1101/2021.02.03.436147>; this version posted February 8, 2021. The copyright holder for this preprint (which was not certified by peer review) is the author/funder. All rights reserved. No reuse allowed without permission.

Experimental design for (B and F). (B) Triglyceride levels obtained from animals depicted in main fig. 5 B. n≥3. (C) Pyruvate tolerance test to evaluate liver gluconeogenesis. ND-fed *Csf1r<sup>Cre</sup>Maf<sup>F/F</sup>* mice and littermate controls were fasted for 16 hours. Sodium pyruvate (1g/kg) was then injected intraperitoneally and glucose blood levels were evaluated in the depicted times. n = 8 to 10 per group. (D) Experimental design for (E). (E) Serum triglyceride content in ND-fed *Csf1r<sup>Cre</sup>Maf<sup>F/F</sup>* mice and littermate controls after gavage with 200 µl of olive oil. Mice were fasted for 6 hours before gavage. Triton WR1339 (0.5 g/kg) was injected intraperitoneally 30 min before gavage. n=8, per group. (F) Distribution of myeloid cells per gram of eWAT in *Csf1r<sup>Cre</sup>Maf<sup>F/F</sup>* mice submitted to HFD used in main fig. 5 B. eMon: eWAT Ly6C<sup>HIGH</sup> Monocytes. Ly6C<sup>LOW</sup> Mon: Ly6C<sup>LOW</sup> Monocytes. Neu: Neutrophils. Eos: Eosinophils. DCs: Dendritic cells. n≥3. Representative of 3 independent experiments. Each dot in the bar graphs represents one animal. Bar graphs display mean values.
